# Supplementary material
Source: publisher figshare collection journal article supplement (https://acs.figshare.com/ndownloader/files/20333427)
Supplement: Supplementary file 1 [file 20333427]

## Sheet: 0382
Int3D_structure	chain A	chain B	x	mean_stiffness	SD_stiffness	mean_probability	SD_probability	mean_affinity_1 (kcal/mol)	SD_affinity	mean_affinity_2 (kcal/mol)	SD_affinity	number of frame	x	x	x	x	x	x	x	x	x	x	x	x	x	x	x	x	x	x	x	x	x	x	x	x	x	x	x	x	x	x	x	Int3D_structure	mutation	chain A	chain B	x	mean_stiffness
O60271-P84077-MDL-2w83.pdb1-C-0-A-0.pdb	B	B	|Low-Medium|	35.6776	0.725279	0.921804	0.0514262	-10.9	0	-11.15	0.0707107	2	|Low|	68.0542	4.49853	0.128786	0.141454	-9.0665	0.199396	-8.00126	0.438689	397	|High-Medium|	0	0	0	0	0	0	0	0	0	|High|	0	0	0	0	0	0	0	0	0	#mutated->#	O60271-P84077-MDL-2w83.pdb1-C-0-A-0.pdb	EB102T	B	A	|Low-Medium|	0
P00533-P01133-EXP-1nql.pdb1-A-0-B-0.pdb	B	B	|Low-Medium|	36.5509	1.05696	0.839059	0.0913704	-10.8387	0.0945527	-11.0387	0.10632	111	|Low|	41.6928	2.73499	0.861456	0.0886458	-10.4683	0.188126	-10.5472	0.269838	290	|High-Medium|	0	0	0	0	0	0	0	0	0	|High|	0	0	0	0	0	0	0	0	0	#mutated->#	P00533-P01133-EXP-1nql.pdb1-A-0-B-0.pdb	KB48T	B	A	|Low-Medium|	36.4812
P01903-P13760-EXP-5ni9.pdb1-A-0-B-0.pdb	A	B	|Low-Medium|	0	0	0	0	0	0	0	0	0	|Low|	0	0	0	0	0	0	0	0	0	|High-Medium|	0	0	0	0	0	0	0	0	0	|High|	14.6529	0.584114	0.950485	0.0388068	-13.4536	0.119971	-13.1599	0.0641013	401	#mutated->#	P01903-P13760-EXP-5ni9.pdb1-A-0-B-0.pdb	FA24S	A	B	|Low-Medium|	0
P01903-P28067-EXP-4fqx.pdb1-A-0-C-0.pdb	A	B	|Low-Medium|	29.6296	0	0.711824	0	-11.4	0	-11.7	0	1	|Low|	0	0	0	0	0	0	0	0	0	|High-Medium|	26.1709	0.850325	0.963827	0.0416337	-11.7952	0.101874	-12.0497	0.0878592	400	|High|	0	0	0	0	0	0	0	0	0	#mutated->#	P01903-P28067-EXP-4fqx.pdb1-A-0-C-0.pdb	GA49S	A	B	|Low-Medium|	0
P06213-P18031-EXP-2b4s.pdb1-B-0-A-0.pdb	B	B	|Low-Medium|	30.8695	1.14028	0.82942	0.0908446	-11.3198	0.104187	-11.5926	0.113774	81	|Low|	0	0	0	0	0	0	0	0	0	|High-Medium|	27.623	1.17795	0.861356	0.0820341	-11.6406	0.130009	-11.9031	0.115246	320	|High|	0	0	0	0	0	0	0	0	0	#mutated->#	P06213-P18031-EXP-2b4s.pdb1-B-0-A-0.pdb	DB181A	B	A	|Low-Medium|	31.0521
P07900-Q9UHD1-MDL-2xcm.pdb2-B-0-F-0.pdb	A	B	|Low-Medium|	0	0	0	0	0	0	0	0	0	|Low|	62.965	9.25277	0.338877	0.309866	-9.30528	0.458392	-8.49434	0.90076	265	|High-Medium|	0	0	0	0	0	0	0	0	0	|High|	0	0	0	0	0	0	0	0	0	#mutated->#	P07900-Q9UHD1-MDL-2xcm.pdb2-B-0-F-0.pdb	EA32A	A	B	|Low-Medium|	0
P0CG48-Q92905-MDL-5u4p.pdb1-C-0-B-0.pdb	B	B	|Low-Medium|	0	0	0	0	0	0	0	0	0	|Low|	0	0	0	0	0	0	0	0	0	|High-Medium|	26.2917	1.17579	0.949719	0.0576004	-11.7828	0.132394	-12.0347	0.120293	401	|High|	0	0	0	0	0	0	0	0	0	#mutated->#	P0CG48-Q92905-MDL-5u4p.pdb1-C-0-B-0.pdb	HB158Q	B	A	|Low-Medium|	0
P16220-Q92793-EXP-2lxt.pdb1-C-0-A-0.pdb	A	B	|Low-Medium|	35.4725	2.08681	0.881514	0.100762	-10.94	0.167332	-11.16	0.181659	5	|Low|	42.6355	1.47086	0.91807	0.0522031	-10.3939	0.111667	-10.4422	0.144132	396	|High-Medium|	0	0	0	0	0	0	0	0	0	|High|	0	0	0	0	0	0	0	0	0	#mutated->#	P16220-Q92793-EXP-2lxt.pdb1-C-0-A-0.pdb	SA142L	A	B	|Low-Medium|	37.6319
P27986-P42336-EXP-4jps.pdb1-B-0-A-0.pdb	B	B	|Low-Medium|	0	0	0	0	0	0	0	0	0	|Low|	0	0	0	0	0	0	0	0	0	|High-Medium|	0	0	0	0	0	0	0	0	0	|High|	7.99397	0.417078	0.137486	0.0388336	-15.1923	0.152856	-13.806	0.0454323	401	#mutated->#	P27986-P42336-EXP-4jps.pdb1-B-0-A-0.pdb	EB545K	B	A	|Low-Medium|	0
P51587-Q06609-EXP-1n0w.pdb1-B-0-A-0.pdb	A	B	|Low-Medium|	30.3484	0.890446	0.78474	0.0849036	-11.3855	0.0907902	-11.6323	0.0888484	124	|Low|	0	0	0	0	0	0	0	0	0	|High-Medium|	28.2636	1.12058	0.804793	0.0893895	-11.5791	0.118544	-11.839	0.116079	277	|High|	0	0	0	0	0	0	0	0	0	#mutated->#	P51587-Q06609-EXP-1n0w.pdb1-B-0-A-0.pdb	VA1532I	A	B	|Low-Medium|	30.504
P61964-Q03164-EXP-3emh.pdb1-A-0-B-0.pdb	B	B	|Low-Medium|	95.1598	4.55035	0.0014	0	-8.14521	0.136511	-5.39498	0.453551	219	|Low|	80	0	0.00465205	0	-8.6	0	-6.8	0	18	|High-Medium|	0	0	0	0	0	0	0	0	0	|High|	0	0	0	0	0	0	0	0	0	#mutated->#	P61964-Q03164-EXP-3emh.pdb1-A-0-B-0.pdb	HB6F	B	A	|Low-Medium|	94.2326
P78314-Q9H2K2-EXP-3twr.pdb2-F-0-B-0.pdb	A	B	|Low-Medium|	0	0	0	0	0	0	0	0	0	|Low|	47.2222	0	0.995789	0	-10.1	0	-10	0	401	|High-Medium|	0	0	0	0	0	0	0	0	0	|High|	0	0	0	0	0	0	0	0	0	#mutated->#	P78314-Q9H2K2-EXP-3twr.pdb2-F-0-B-0.pdb	SA13E	A	B	|Low-Medium|	36.361
Q07817-Q13794-MDD-Bcl-2-PMAIP1-2nla-A-213-312-B-73-93.pdb	B	B	|Low-Medium|	0	0	0	0	0	0	0	0	0	|Low|	60.7062	6.54574	0.403282	0.28678	-9.39127	0.32109	-8.70574	0.636508	401	|High-Medium|	0	0	0	0	0	0	0	0	0	|High|	0	0	0	0	0	0	0	0	0	#mutated->#	Q07817-Q13794-MDD-Bcl-2-PMAIP1-2nla-A-213-312-B-73-93.pdb	KB112E	B	A	|Low-Medium|	0
Q8IZQ1-Q9GZQ8-MDL-3wim.pdb1-B-0-A-0.pdb	B	B	|Low-Medium|	35.3496	1.83628	0.893466	0.100223	-10.9412	0.149985	-11.1618	0.185888	34	|Low|	44.2067	3.7651	0.911511	0.0921716	-10.3033	0.240525	-10.3025	0.363875	366	|High-Medium|	26.8421	0	0.935894	0	-11.7	0	-12	0	1	|High|	0	0	0	0	0	0	0	0	0	#mutated->#	Q8IZQ1-Q9GZQ8-MDL-3wim.pdb1-B-0-A-0.pdb	HB63D	B	A	|Low-Medium|	35.7541
Q8NFJ9-Q9H0F7-MDL-4v0n.pdb3-B-0-A-0.pdb	B	B	|Low-Medium|	36.7647	0	0.831812	0	-10.8	0	-11	0	1	|Low|	44.9529	3.07812	0.94295	0.0596928	-10.2462	0.204672	-10.22	0.291053	400	|High-Medium|	0	0	0	0	0	0	0	0	0	|High|	0	0	0	0	0	0	0	0	0	#mutated->#	Q8NFJ9-Q9H0F7-MDL-4v0n.pdb3-B-0-A-0.pdb	QB444L	B	A	|Low-Medium|	37.7043
Q96CV9-Q9UHD2-EXP-5eof.pdb1-A-0-C-0.pdb	A	B	|Low-Medium|	31.3727	1.50729	0.859015	0.0991983	-11.2697	0.142489	-11.5424	0.147966	33	|Low|	40.3263	0.824133	0.82422	0.0418956	-10.55	0.0707107	-10.65	0.0707107	2	|High-Medium|	26.2359	1.57316	0.938763	0.0807906	-11.7934	0.17141	-12.0328	0.154623	366	|High|	0	0	0	0	0	0	0	0	0	#mutated->#	Q96CV9-Q9UHD2-EXP-5eof.pdb1-A-0-C-0.pdb	EA50K	A	B	|Low-Medium|	29.9538
Q9H2K2-Q9NWT6-EXP-2y0i.pdb1-S-0-A-0.pdb	A	B	|Low-Medium|	0	0	0	0	0	0	0	0	0	|Low|	49.5586	1.81303	0.939354	0.0576286	-9.95212	0.117268	-9.74963	0.17119	401	|High-Medium|	0	0	0	0	0	0	0	0	0	|High|	0	0	0	0	0	0	0	0	0	#mutated->#	Q9H2K2-Q9NWT6-EXP-2y0i.pdb1-S-0-A-0.pdb	HA553D	A	B	|Low-Medium|	36.3636
[truncated: 39 more columns]

## Sheet: 0119
x	x	x	x	x	x	x	x	x	x	x	x	x	x	x	x	x	x	x	x	x	x	x	x	x	x	x	x	x	x	x	x	x	x	x	x	x	x	x	x	x	x	x	x	x	x	x	x	x	x
O14893-P62304-EXP-5xjl.pdb1-2-0-E-0.pdb	A	A	|Low-Medium|	34.5229	2.097	0.908102	0.0860327	-11.0083	0.163371	-11.2653	0.204292	72	|Low|	40.9851	2.10451	0.843112	0.0859107	-10.5028	0.145269	-10.6127	0.21104	316	|High-Medium|	24.2896	2.37456	0.951138	0.0665115	-12.0273	0.306891	-12.2182	0.227236	11	|High|	0	0	0	0	0	0	0	0	0	#mutated->#	O14893-P62304-EXP-5xjl.pdb1-2-0-E-0.pdb	YA52D	A	B	|Low-Medium|	35.7339
O94829-P47813-EXP-3zjy.pdb1-B-0-C-0.pdb	A	A	|Low-Medium|	0	0	0	0	0	0	0	0	0	|Low|	58.6211	3.927	0.467416	0.185699	-9.4773	0.220073	-8.93374	0.380905	163	|High-Medium|	0	0	0	0	0	0	0	0	0	|High|	0	0	0	0	0	0	0	0	0	#mutated->#	O94829-P47813-EXP-3zjy.pdb1-B-0-C-0.pdb	DA481R	A	B	|Low-Medium|	31.019
P01903-P13760-EXP-5ni9.pdb1-A-0-B-0.pdb	A	A	|Low-Medium|	0	0	0	0	0	0	0	0	0	|Low|	0	0	0	0	0	0	0	0	0	|High-Medium|	0	0	0	0	0	0	0	0	0	|High|	14.6529	0.584114	0.950485	0.0388068	-13.4536	0.119971	-13.1599	0.0641013	401	#mutated->#	P01903-P13760-EXP-5ni9.pdb1-A-0-B-0.pdb	GA28D	A	B	|Low-Medium|	0
P01903-P28067-EXP-4fqx.pdb1-A-0-C-0.pdb	A	A	|Low-Medium|	29.6296	0	0.711824	0	-11.4	0	-11.7	0	1	|Low|	0	0	0	0	0	0	0	0	0	|High-Medium|	26.1709	0.850325	0.963827	0.0416337	-11.7952	0.101874	-12.0497	0.0878592	400	|High|	0	0	0	0	0	0	0	0	0	#mutated->#	P01903-P28067-EXP-4fqx.pdb1-A-0-C-0.pdb	WA43F	A	B	|Low-Medium|	29.6296
P03950-P13489-EXP-1a4y.pdb1-B-0-A-0.pdb	B	A	|Low-Medium|	0	0	0	0	0	0	0	0	0	|Low|	0	0	0	0	0	0	0	0	0	|High-Medium|	18.7627	0.893727	0.618874	0.115387	-12.75	0.13784	-12.7667	0.10328	6	|High|	15.6207	0.773808	0.838738	0.119092	-13.2747	0.143442	-13.0646	0.0800349	395	#mutated->#	P03950-P13489-EXP-1a4y.pdb1-B-0-A-0.pdb	YB437F	B	A	|Low-Medium|	0
P04271-P31949-MDL-2y5i.pdb2-C-0-D-0.pdb	A	A	|Low-Medium|	30.5932	1.00258	0.80699	0.0874584	-11.3553	0.0978067	-11.6158	0.100071	38	|Low|	0	0	0	0	0	0	0	0	0	|High-Medium|	26.2724	1.6015	0.935841	0.0792696	-11.7871	0.180768	-12.0339	0.159187	363	|High|	0	0	0	0	0	0	0	0	0	#mutated->#	P04271-P31949-MDL-2y5i.pdb2-C-0-D-0.pdb	FA88A	A	B	|Low-Medium|	0
P07998-P13489-EXP-1z7x.pdb1-X-0-W-0.pdb	A	A	|Low-Medium|	30.2695	0.64668	0.780383	0.0656325	-11.3758	0.0560708	-11.6424	0.0708445	33	|Low|	0	0	0	0	0	0	0	0	0	|High-Medium|	26.4887	1.56632	0.92603	0.0821387	-11.7614	0.174631	-12.0114	0.157916	368	|High|	0	0	0	0	0	0	0	0	0	#mutated->#	P07998-P13489-EXP-1z7x.pdb1-X-0-W-0.pdb	NA67D	A	B	|Low-Medium|	30.0968
P08581-P22681-EXP-3bux.pdb6-C-0-D-0.pdb	A	A	|Low-Medium|	0	0	0	0	0	0	0	0	0	|Low|	71.6849	5.08719	0.0733206	0.0981586	-8.89975	0.211469	-7.64478	0.4918	393	|High-Medium|	0	0	0	0	0	0	0	0	0	|High|	0	0	0	0	0	0	0	0	0	#mutated->#	P08581-P22681-EXP-3bux.pdb6-C-0-D-0.pdb	RA1004D	A	B	|Low-Medium|	0
P10398-Q02750-MDL-4mne.pdb1-B-0-A-0.pdb	B	A	|Low-Medium|	29.8791	0.344382	0.740132	0.0390681	-11.4	0	-11.7	0	3	|Low|	0	0	0	0	0	0	0	0	0	|High-Medium|	22.6063	1.97636	0.929402	0.0984521	-12.2195	0.253102	-12.3932	0.19165	395	|High|	16.8686	0.751355	0.62691	0.146045	-13.0333	0.152753	-12.9333	0.057735	3	#mutated->#	P10398-Q02750-MDL-4mne.pdb1-B-0-A-0.pdb	SB433E	B	A	|Low-Medium|	0
P11940-Q9BPZ3-EXP-3kus.pdb2-B-0-D-0.pdb	B	A	|Low-Medium|	0	0	0	0	0	0	0	0	0	|Low|	55.0549	4.86694	0.656961	0.222751	-9.66459	0.2733	-9.2586	0.467046	401	|High-Medium|	0	0	0	0	0	0	0	0	0	|High|	0	0	0	0	0	0	0	0	0	#mutated->#	P11940-Q9BPZ3-EXP-3kus.pdb2-B-0-D-0.pdb	KB116A	B	A	|Low-Medium|	0
P14598-P19878-EXP-pdb1k4u.ent-P-0-S-0.pdb	A	A	|Low-Medium|	0	0	0	0	0	0	0	0	0	|Low|	42.6623	1.61419	0.917	0.0533865	-10.3923	0.111871	-10.4561	0.162231	401	|High-Medium|	0	0	0	0	0	0	0	0	0	|High|	0	0	0	0	0	0	0	0	0	#mutated->#	P14598-P19878-EXP-pdb1k4u.ent-P-0-S-0.pdb	KA385E	A	B	|Low-Medium|	36.9359
P22681-Q9C004-EXP-3bun.pdb3-B-0-A-0.pdb	A	A	|Low-Medium|	34.6598	1.95246	0.913289	0.0816159	-10.9987	0.163361	-11.2252	0.193469	306	|Low|	42.1001	4.57448	0.832766	0.133573	-10.444	0.279765	-10.5033	0.444335	91	|High-Medium|	28.9732	0.310713	0.743036	0.0360834	-11.5	0	-11.75	0.057735	4	|High|	0	0	0	0	0	0	0	0	0	#mutated->#	P22681-Q9C004-EXP-3bun.pdb3-B-0-A-0.pdb	FA336A	A	B	|Low-Medium|	35.4201
P50213-P51553-EXP-5gri.pdb1-A-0-B-0.pdb	B	A	|Low-Medium|	0	0	0	0	0	0	0	0	0	|Low|	0	0	0	0	0	0	0	0	0	|High-Medium|	0	0	0	0	0	0	0	0	0	|High|	15.1159	0.787073	0.899941	0.0970764	-13.3676	0.150985	-13.1155	0.080996	401	#mutated->#	P50213-P51553-EXP-5gri.pdb1-A-0-B-0.pdb	RB97Q	B	A	|Low-Medium|	0
P51587-Q06609-EXP-1n0w.pdb1-B-0-A-0.pdb	A	A	|Low-Medium|	30.3484	0.890446	0.78474	0.0849036	-11.3855	0.0907902	-11.6323	0.0888484	124	|Low|	0	0	0	0	0	0	0	0	0	|High-Medium|	28.2636	1.12058	0.804793	0.0893895	-11.5791	0.118544	-11.839	0.116079	277	|High|	0	0	0	0	0	0	0	0	0	#mutated->#	P51587-Q06609-EXP-1n0w.pdb1-B-0-A-0.pdb	TA1526A	A	B	|Low-Medium|	30.2498
P51809-P52594-MDL-2vx8.pdb1-B-0-A-0.pdb	A	A	|Low-Medium|	35.0005	1.38228	0.932742	0.061548	-10.966	0.116839	-11.1978	0.141741	315	|Low|	39.2797	0.518857	0.768786	0.0288732	-10.6233	0.0451779	-10.7628	0.0554055	86	|High-Medium|	0	0	0	0	0	0	0	0	0	|High|	0	0	0	0	0	0	0	0	0	#mutated->#	P51809-P52594-MDL-2vx8.pdb1-B-0-A-0.pdb	YA45S	A	B	|Low-Medium|	34.9608
P55957-Q07817-EXP-4qve.pdb1-B-0-A-0.pdb	A	A	|Low-Medium|	0	0	0	0	0	0	0	0	0	|Low|	49.0275	3.52763	0.913425	0.0865009	-10.0025	0.205411	-9.83516	0.343927	401	|High-Medium|	0	0	0	0	0	0	0	0	0	|High|	0	0	0	0	0	0	0	0	0	#mutated->#	P55957-Q07817-EXP-4qve.pdb1-B-0-A-0.pdb	GA94A	A	B	|Low-Medium|	0
P60842-P78344-MDL-2vso.pdb1-A-0-E-0.pdb	A	A	|Low-Medium|	30.5012	0.035426	0.808794	0.0037016	-11.4	0	-11.6	0	2	|Low|	0	0	0	0	0	0	0	0	0	|High-Medium|	23.6328	1.7063	0.973179	0.0636329	-12.0945	0.214241	-12.2932	0.168437	399	|High|	0	0	0	0	0	0	0	0	0	#mutated->#	P60842-P78344-MDL-2vso.pdb1-A-0-E-0.pdb	EA246K	A	B	|Low-Medium|	37.2549
P60842-Q04637-MDL-2vsx.pdb1-B-0-F-0.pdb	B	A	|Low-Medium|	31.9619	1.407	0.904416	0.0868958	-11.223	0.125962	-11.4846	0.128386	370	|Low|	0	0	0	0	0	0	0	0	0	|High-Medium|	27.9832	1.25557	0.828068	0.0866753	-11.6	0.141421	-11.8677	0.139969	31	|High|	0	0	0	0	0	0	0	0	0	#mutated->#	P60842-Q04637-MDL-2vsx.pdb1-B-0-F-0.pdb	FB599A	B	A	|Low-Medium|	31.7741
P61006-Q01968-EXP-3qbt.pdb3-E-0-F-0.pdb	B	A	|Low-Medium|	31.1223	1.3914	0.842684	0.097059	-11.3075	0.132071	-11.571	0.136398	93	|Low|	0	0	0	0	0	0	0	0	0	|High-Medium|	26.8931	1.53598	0.903146	0.0945022	-11.7263	0.166561	-11.9679	0.152416	308	|High|	0	0	0	0	0	0	0	0	0	#mutated->#	P61006-Q01968-EXP-3qbt.pdb3-E-0-F-0.pdb	FB668A	B	A	|Low-Medium|	31.231
P61326-Q9BRP8-MDD-Mago_nashi-Mago-bind-1rk8-B-6-144-C-10-35.pdb	A	A	|Low-Medium|	34.2801	2.38451	0.892857	0.0971717	-11.0276	0.198939	-11.2741	0.239561	58	|Low|	45.3879	3.51774	0.937952	0.0898185	-10.2162	0.225387	-10.1959	0.34783	340	|High-Medium|	28.0087	1.16721	0.833465	0.0987405	-11.5667	0.11547	-11.8667	0.11547	3	|High|	0	0	0	0	0	0	0	0	0	#mutated->#	P61326-Q9BRP8-MDD-Mago_nashi-Mago-bind-1rk8-B-6-144-C-10-35.pdb	EA64R	A	B	|Low-Medium|	35.0484
P61964-Q03164-EXP-3emh.pdb1-A-0-B-0.pdb	B	A	|Low-Medium|	95.1598	4.55035	0.0014	0	-8.14521	0.136511	-5.39498	0.453551	219	|Low|	80	0	0.00465205	0	-8.6	0	-6.8	0	18	|High-Medium|	0	0	0	0	0	0	0	0	0	|High|	0	0	0	0	0	0	0	0	0	#mutated->#	P61964-Q03164-EXP-3emh.pdb1-A-0-B-0.pdb	HB6A	B	A	|Low-Medium|	94.1176
P62805-Q9Y468-EXP-2rje.pdb3-Q-0-B-0.pdb	B	A	|Low-Medium|	0	0	0	0	0	0	0	0	0	|Low|	69.0909	0	0.0788145	0	-9	0	-7.9	0	401	|High-Medium|	0	0	0	0	0	0	0	0	0	|High|	0	0	0	0	0	0	0	0	0	#mutated->#	P62805-Q9Y468-EXP-2rje.pdb3-Q-0-B-0.pdb	DB355N	B	A	|Low-Medium|	0
P62877-Q93034-EXP-3dpl.pdb1-R-0-C-0.pdb	A	A	|Low-Medium|	0	0	0	0	0	0	0	0	0	|Low|	0	0	0	0	0	0	0	0	0	|High-Medium|	19.8746	1.11631	0.750778	0.123721	-12.5892	0.16462	-12.6555	0.110162	353	|High|	16.8627	0.69091	0.626208	0.128847	-13.0563	0.131935	-12.9521	0.0651988	48	#mutated->#	P62877-Q93034-EXP-3dpl.pdb1-R-0-C-0.pdb	VA38P	A	B	|Low-Medium|	0
P63000-Q14185-MDL-2yin.pdb1-D-0-B-0.pdb	B	A	|Low-Medium|	0	0	0	0	0	0	0	0	0	|Low|	0	0	0	0	0	0	0	0	0	|High-Medium|	0	0	0	0	0	0	0	0	0	|High|	13.5114	0.602565	0.95812	0.0344189	-13.69	0.127672	-13.2698	0.0682804	401	#mutated->#	P63000-Q14185-MDL-2yin.pdb1-D-0-B-0.pdb	PB474X	B	A	|Low-Medium|	0
Q13043-Q7L9L4-MDL-5twg.pdb1-E-0-A-0.pdb	B	A	|Low-Medium|	89.5238	1.76346	0.0014	0	-8.25	0.092582	-5.9	0.185164	8	|Low|	55.5858	7.41139	0.643465	0.296964	-9.65561	0.371035	-9.19923	0.718285	392	|High-Medium|	0	0	0	0	0	0	0	0	0	|High|	0	0	0	0	0	0	0	0	0	#mutated->#	Q13043-Q7L9L4-MDL-5twg.pdb1-E-0-A-0.pdb	KB142A	B	A	|Low-Medium|	0
Q13133-Q15788-EXP-5hjs.pdb1-A-0-C-0.pdb	B	A	|Low-Medium|	91.7232	4.05047	0.0014	0	-8.22652	0.120016	-5.69669	0.37311	181	|Low|	80.5624	4.01814	0.00869604	0.0169101	-8.57955	0.158733	-6.78182	0.394061	220	|High-Medium|	0	0	0	0	0	0	0	0	0	|High|	0	0	0	0	0	0	0	0	0	#mutated->#	Q13133-Q15788-EXP-5hjs.pdb1-A-0-C-0.pdb	LB8A	B	A	|Low-Medium|	90.5312
Q13191-Q96B97-EXP-2bz8.pdb1-C-0-A-0.pdb	A	A	|Low-Medium|	35.0529	1.50238	0.936506	0.052183	-10.9667	0.11547	-11.2	0.173205	3	|Low|	59.9699	8.6826	0.457524	0.337271	-9.44354	0.43092	-8.78391	0.837564	379	|High-Medium|	28.5714	0	0.788682	0	-11.5	0	-11.8	0	1	|High|	0	0	0	0	0	0	0	0	0	#mutated->#	Q13191-Q96B97-EXP-2bz8.pdb1-C-0-A-0.pdb	KA907L	A	B	|Low-Medium|	33.3333
Q15019-Q8IYM1-MDL-3ftq.pdb5-A-0-B-0.pdb	B	A	|Low-Medium|	0	0	0	0	0	0	0	0	0	|Low|	0	0	0	0	0	0	0	0	0	|High-Medium|	21.7796	0.89318	0.92381	0.0532456	-12.3197	0.122825	-12.4731	0.090955	401	|High|	0	0	0	0	0	0	0	0	0	#mutated->#	Q15019-Q8IYM1-MDL-3ftq.pdb5-A-0-B-0.pdb	TB315M	B	A	|Low-Medium|	0
[truncated: 38 more columns]

## Sheet: 2227
x	x	x	x	x	x	x	x	x	x	x	x	x	x	x	x	x	x	x	x	x	x	x	x	x	x	x	x	x	x	x	x	x	x	x	x	x	x	x	x	x	x	x	x	x	x	x	x	x	x
P01112-P21359-MDL-1wq1.pdb1-R-0-G-0.pdb	A	B	|Low-Medium|	31.4747	1.30291	0.874342	0.083229	-11.2684	0.117361	-11.5324	0.128848	244	|Low|	0	0	0	0	0	0	0	0	0	|High-Medium|	26.6084	1.79591	0.909856	0.105908	-11.7516	0.194015	-11.9975	0.17466	157	|High|	0	0	0	0	0	0	0	0	0	#mutated->#	P01112-P21359-MDL-1wq1.pdb1-R-0-G-0.pdb	GA12V	A	B	|Low-Medium|	31.0167
P04222-P43632-MDL-4n8v.pdb1-A-0-G-0.pdb	B	B	|Low-Medium|	31.5442	1.96292	0.843515	0.0869381	-11.2713	0.171006	-11.5266	0.187989	282	|Low|	39.7137	1.5424	0.787473	0.0761265	-10.585	0.113671	-10.74	0.142902	20	|High-Medium|	28.3053	0.978143	0.804412	0.0780533	-11.5818	0.107251	-11.8242	0.102111	99	|High|	0	0	0	0	0	0	0	0	0	#mutated->#	P04222-P43632-MDL-4n8v.pdb1-A-0-G-0.pdb	AB452S	B	A	|Low-Medium|	32.6038
P06213-P17706-MDL-2b4s.pdb1-B-0-A-0.pdb	B	B	|Low-Medium|	0	0	0	0	0	0	0	0	0	|Low|	0	0	0	0	0	0	0	0	0	|High-Medium|	23.8968	1.38628	0.989413	0.0503405	-12.0566	0.171646	-12.2673	0.135665	401	|High|	0	0	0	0	0	0	0	0	0	#mutated->#	P06213-P17706-MDL-2b4s.pdb1-B-0-A-0.pdb	DB475A	B	A	|Low-Medium|	30.3845
P10321-P43632-MDL-4n8v.pdb1-A-0-G-0.pdb	B	B	|Low-Medium|	35.1412	1.46161	0.923104	0.076261	-10.9423	0.112561	-11.1979	0.149452	142	|Low|	40.2317	1.58908	0.812937	0.069753	-10.5566	0.105745	-10.6911	0.166089	258	|High-Medium|	29.4118	0	0.690568	0	-11.5	0	-11.7	0	1	|High|	0	0	0	0	0	0	0	0	0	#mutated->#	P10321-P43632-MDL-4n8v.pdb1-A-0-G-0.pdb	AB451S	B	A	|Low-Medium|	37.299
P30484-P43632-MDL-4n8v.pdb2-D-0-I-0.pdb	B	B	|Low-Medium|	35.1738	2.29658	0.866959	0.0877778	-10.9563	0.192406	-11.1662	0.231243	302	|Low|	39.018	0.952495	0.752809	0.0498874	-10.6492	0.0679068	-10.8085	0.10387	59	|High-Medium|	27.6396	1.18672	0.860177	0.0984434	-11.6475	0.119802	-11.895	0.117561	40	|High|	0	0	0	0	0	0	0	0	0	#mutated->#	P30484-P43632-MDL-4n8v.pdb2-D-0-I-0.pdb	AB452S	B	A	|Low-Medium|	35.4727
P30505-P43632-MDL-4n8v.pdb2-D-0-I-0.pdb	B	B	|Low-Medium|	33.4088	2.2762	0.901282	0.0768558	-11.1032	0.199498	-11.3453	0.221129	316	|Low|	39.0951	1.25326	0.755324	0.0597398	-10.6467	0.0860366	-10.7833	0.126173	30	|High-Medium|	28.0095	1.14258	0.828743	0.0935367	-11.6	0.120185	-11.8545	0.122955	55	|High|	0	0	0	0	0	0	0	0	0	#mutated->#	P30505-P43632-MDL-4n8v.pdb2-D-0-I-0.pdb	AB451S	B	A	|Low-Medium|	34.3991
P43632-Q29865-MDL-4n8v.pdb2-I-0-D-0.pdb	A	B	|Low-Medium|	35.6296	1.45103	0.895069	0.0799978	-10.9068	0.12129	-11.1315	0.148442	146	|Low|	40.2944	1.12321	0.820324	0.0569982	-10.5549	0.0853749	-10.6886	0.107165	255	|High-Medium|	0	0	0	0	0	0	0	0	0	|High|	0	0	0	0	0	0	0	0	0	#mutated->#	P43632-Q29865-MDL-4n8v.pdb2-I-0-D-0.pdb	KA38M	A	B	|Low-Medium|	35.7167
P43632-Q31612-MDL-4n8v.pdb2-I-0-D-0.pdb	A	B	|Low-Medium|	36.0978	1.59134	0.856574	0.106761	-10.8707	0.134686	-11.0837	0.160547	92	|Low|	40.8159	1.39428	0.843528	0.0628536	-10.534	0.101502	-10.6311	0.137011	309	|High-Medium|	0	0	0	0	0	0	0	0	0	|High|	0	0	0	0	0	0	0	0	0	#mutated->#	P43632-Q31612-MDL-4n8v.pdb2-I-0-D-0.pdb	AA178S	A	B	|Low-Medium|	36.395
P43632-Q95604-MDL-4n8v.pdb2-I-0-D-0.pdb	A	B	|Low-Medium|	35.425	2.19151	0.862064	0.0893315	-10.9297	0.186673	-11.1599	0.209052	172	|Low|	39.4329	0.768588	0.776518	0.0411145	-10.6266	0.0696958	-10.7786	0.0779438	229	|High-Medium|	0	0	0	0	0	0	0	0	0	|High|	0	0	0	0	0	0	0	0	0	#mutated->#	P43632-Q95604-MDL-4n8v.pdb2-I-0-D-0.pdb	AA178S	A	B	|Low-Medium|	35.2183
[truncated: 38 more columns]

## Sheet: 1132
x	x	x	x	x	x	x	x	x	x	x	x	x	x	x	x	x	x	x	x	x	x	x	x	x	x	x	x	x	x	x	x	x	x	x	x	x	x	x	x	x	x	x	x	x	x	x	x	x	x
O43353-Q9BX69-MDD-CARD-CARD-5wvc-E-6-90-D-205-292.pdb	B	A	|Low-Medium|	37.2728	0.857084	0.775646	0.0931469	-10.75	0.0707107	-10.95	0.0707107	2	|Low|	61.0177	6.69448	0.389384	0.274102	-9.37995	0.331358	-8.67143	0.646588	399	|High-Medium|	0	0	0	0	0	0	0	0	0	|High|	0	0	0	0	0	0	0	0	0	#mutated->#	O43353-Q9BX69-MDD-CARD-CARD-5wvc-E-6-90-D-205-292.pdb	LB109R	B	A	|Low-Medium|	0
P00533-P16234-MDL-3g0f.pdb1-A-1-B-1.pdb	A	A	|Low-Medium|	32.7457	0.787923	0.966124	0.0264869	-11.1556	0.069819	-11.4107	0.0768747	401	|Low|	0	0	0	0	0	0	0	0	0	|High-Medium|	0	0	0	0	0	0	0	0	0	|High|	0	0	0	0	0	0	0	0	0	#mutated->#	P00533-P16234-MDL-3g0f.pdb1-A-1-B-1.pdb	LA143R	A	B	|Low-Medium|	32.8212
P01834-P18465-EXP-3vh8.pdb2-F-0-D-0.pdb	A	A	|Low-Medium|	0	0	0	0	0	0	0	0	0	|Low|	59.3724	2.08969	0.441808	0.117045	-9.48454	0.101293	-8.87082	0.205235	401	|High-Medium|	0	0	0	0	0	0	0	0	0	|High|	0	0	0	0	0	0	0	0	0	#mutated->#	P01834-P18465-EXP-3vh8.pdb2-F-0-D-0.pdb	SA8F	A	B	|Low-Medium|	0
P04626-Q99952-EXP-4gfu.pdb1-F-0-A-0.pdb	B	A	|Low-Medium|	36.6694	1.24444	0.83273	0.120248	-10.85	0.0707107	-11	0.141421	2	|Low|	44.0264	1.83513	0.953275	0.0462987	-10.3075	0.12214	-10.312	0.176668	399	|High-Medium|	0	0	0	0	0	0	0	0	0	|High|	0	0	0	0	0	0	0	0	0	#mutated->#	P04626-Q99952-EXP-4gfu.pdb1-F-0-A-0.pdb	DB197A	B	A	|Low-Medium|	36.7965
P18465-P43629-EXP-3vh8.pdb1-A-0-G-0.pdb	B	A	|Low-Medium|	0	0	0	0	0	0	0	0	0	|Low|	0	0	0	0	0	0	0	0	0	|High-Medium|	22.5234	1.24231	0.955334	0.0529225	-12.2249	0.158356	-12.4025	0.124072	401	|High|	0	0	0	0	0	0	0	0	0	#mutated->#	P18465-P43629-EXP-3vh8.pdb1-A-0-G-0.pdb	SB227A	B	A	|Low-Medium|	0
P30501-P43632-MDL-4n8v.pdb2-D-0-I-0.pdb	B	A	|Low-Medium|	34.389	1.5936	0.944329	0.0795132	-11.0126	0.132718	-11.2573	0.152791	293	|Low|	39.6155	0.960845	0.785621	0.0496709	-10.6028	0.067614	-10.7528	0.0869615	108	|High-Medium|	0	0	0	0	0	0	0	0	0	|High|	0	0	0	0	0	0	0	0	0	#mutated->#	P30501-P43632-MDL-4n8v.pdb2-D-0-I-0.pdb	KB311M	B	A	|Low-Medium|	34.5517
P30505-P43628-MDL-4n8v.pdb1-A-0-G-0.pdb	B	A	|Low-Medium|	35.971	2.23385	0.823862	0.0925662	-10.8924	0.189582	-11.0962	0.215337	131	|Low|	39.4009	0.923929	0.774232	0.0493579	-10.6211	0.0660448	-10.7625	0.0875309	261	|High-Medium|	27.9455	0.916873	0.841283	0.0834202	-11.6333	0.1	-11.8444	0.0881917	9	|High|	0	0	0	0	0	0	0	0	0	#mutated->#	P30505-P43628-MDL-4n8v.pdb1-A-0-G-0.pdb	QB338P	B	A	|Low-Medium|	35.1654
P30622-Q14203-EXP-2hqh.pdb5-F-2-B-2.pdb	B	A	|Low-Medium|	34.7368	0	0.978062	0	-11	0	-11.2	0	1	|Low|	48.8346	3.73023	0.916989	0.115958	-10.012	0.217426	-9.856	0.360748	400	|High-Medium|	0	0	0	0	0	0	0	0	0	|High|	0	0	0	0	0	0	0	0	0	#mutated->#	P30622-Q14203-EXP-2hqh.pdb5-F-2-B-2.pdb	QB93R	B	A	|Low-Medium|	36.3837
P43628-Q29960-MDL-4n8v.pdb1-G-0-A-0.pdb	A	A	|Low-Medium|	35.9805	1.60452	0.862632	0.087667	-10.8938	0.128246	-11.092	0.161713	112	|Low|	40.3279	1.68154	0.817219	0.0769011	-10.559	0.117709	-10.6795	0.164742	288	|High-Medium|	26.8398	0	0.93604	0	-11.7	0	-12	0	1	|High|	0	0	0	0	0	0	0	0	0	#mutated->#	P43628-Q29960-MDL-4n8v.pdb1-G-0-A-0.pdb	QA65P	A	B	|Low-Medium|	36.5646
P62330-Q9NZ52-MDL-1j2j.pdb1-A-0-B-0.pdb	A	A	|Low-Medium|	34.2035	1.68622	0.952532	0.0388605	-11.025	0.125831	-11.25	0.173205	4	|Low|	48.6945	4.13258	0.905573	0.119776	-10.0182	0.244272	-9.86212	0.401742	396	|High-Medium|	28.5714	0	0.788682	0	-11.5	0	-11.8	0	1	|High|	0	0	0	0	0	0	0	0	0	#mutated->#	P62330-Q9NZ52-MDL-1j2j.pdb1-A-0-B-0.pdb	QA54L	A	B	|Low-Medium|	37.1265
P68431-Q9UER7-MDL-4h9n.pdb1-A-0-C-0.pdb	B	A	|Low-Medium|	0	0	0	0	0	0	0	0	0	|Low|	0	0	0	0	0	0	0	0	0	|High-Medium|	0	0	0	0	0	0	0	0	0	|High|	12.5523	0.514932	0.871095	0.0735051	-13.898	0.121639	-13.3646	0.0582485	401	#mutated->#	P68431-Q9UER7-MDL-4h9n.pdb1-A-0-C-0.pdb	EB142M	B	A	|Low-Medium|	0
[truncated: 38 more columns]

## Sheet: 1128
x	x	x	x	x	x	x	x	x	x	x	x	x	x	x	x	x	x	x	x	x	x	x	x	x	x	x	x	x	x	x	x	x	x	x	x	x	x	x	x	x	x	x	x	x	x	x	x	x	x
A6ND01-Q8IYV9-EXP-5f4e.pdb1-B-0-A-0.pdb	B	A	|Low-Medium|	31.1009	1.17506	0.850398	0.0992795	-11.3061	0.106524	-11.5652	0.118312	66	|Low|	0	0	0	0	0	0	0	0	0	|High-Medium|	27.2448	1.29613	0.887286	0.0802445	-11.6812	0.143434	-11.9409	0.126322	335	|High|	0	0	0	0	0	0	0	0	0	#mutated->#	A6ND01-Q8IYV9-EXP-5f4e.pdb1-B-0-A-0.pdb	WB148A	B	A	|Low-Medium|	30.579
O00167-Q15475-EXP-4egc.pdb1-B-0-A-0.pdb	A	A	|Low-Medium|	36.8596	1.43075	0.79449	0.0903642	-10.8142	0.125262	-11.0133	0.143617	113	|Low|	39.1587	0.724348	0.761549	0.0396411	-10.6406	0.0564541	-10.783	0.0674739	288	|High-Medium|	0	0	0	0	0	0	0	0	0	|High|	0	0	0	0	0	0	0	0	0	#mutated->#	O00167-Q15475-EXP-4egc.pdb1-B-0-A-0.pdb	AA532R	A	B	|Low-Medium|	36.508
O00255-P17535-EXP-3u86.pdb1-A-0-B-0.pdb	A	A	|Low-Medium|	0	0	0	0	0	0	0	0	0	|Low|	0	0	0	0	0	0	0	0	0	|High-Medium|	24.0272	0.872202	1.00525	0.0114729	-12.0379	0.0980286	-12.2499	0.0857685	401	|High|	0	0	0	0	0	0	0	0	0	#mutated->#	O00255-P17535-EXP-3u86.pdb1-A-0-B-0.pdb	GA281R	A	B	|Low-Medium|	0
O00255-Q03164-EXP-4gq6.pdb1-A-0-B-0.pdb	A	A	|Low-Medium|	0	0	0	0	0	0	0	0	0	|Low|	0	0	0	0	0	0	0	0	0	|High-Medium|	25.4904	0.94087	0.987672	0.0277993	-11.8726	0.109525	-12.1052	0.0948552	401	|High|	0	0	0	0	0	0	0	0	0	#mutated->#	O00255-Q03164-EXP-4gq6.pdb1-A-0-B-0.pdb	DA285R	A	B	|Low-Medium|	0
O00308-Q96B67-MDL-4n7h.pdb1-A-0-B-0.pdb	B	A	|Low-Medium|	89.6032	3.31005	0.0014	0	-8.30833	0.101795	-5.93333	0.29879	24	|Low|	70.7197	6.35602	0.104121	0.119983	-8.9478	0.257513	-7.73525	0.622627	295	|High-Medium|	0	0	0	0	0	0	0	0	0	|High|	0	0	0	0	0	0	0	0	0	#mutated->#	O00308-Q96B67-MDL-4n7h.pdb1-A-0-B-0.pdb	YB36A	B	A	|Low-Medium|	89.1191
O00444-O94986-EXP-4n7v.pdb1-A-0-C-0.pdb	A	A	|Low-Medium|	0	0	0	0	0	0	0	0	0	|Low|	0	0	0	0	0	0	0	0	0	|High-Medium|	20.5767	1.43831	0.81277	0.131301	-12.4883	0.202327	-12.5834	0.142702	392	|High|	17.1079	0.476546	0.580517	0.0928083	-13.0111	0.0781736	-12.9111	0.0333333	9	#mutated->#	O00444-O94986-EXP-4n7v.pdb1-A-0-C-0.pdb	KA685A	A	B	|Low-Medium|	0
O00482-P35222-EXP-3tx7.pdb1-B-0-A-0.pdb	B	A	|Low-Medium|	32.5811	2.12527	0.892076	0.0867408	-11.1796	0.185018	-11.4224	0.203092	201	|Low|	43.9241	2.02973	0.948636	0.0655722	-10.3151	0.129953	-10.3277	0.197409	119	|High-Medium|	27.8368	1.43613	0.834891	0.0975005	-11.6259	0.15474	-11.8815	0.144145	81	|High|	0	0	0	0	0	0	0	0	0	#mutated->#	O00482-P35222-EXP-3tx7.pdb1-B-0-A-0.pdb	YB306A	B	A	|Low-Medium|	32.6952
O00757-P09467-MDL-5q0c.pdb2-E-0-F-0.pdb	B	A	|Low-Medium|	0	0	0	0	0	0	0	0	0	|Low|	0	0	0	0	0	0	0	0	0	|High-Medium|	18.2901	0.941771	0.549361	0.12528	-12.8222	0.139443	-12.8333	0.111803	9	|High|	15.4804	0.986355	0.843763	0.132544	-13.3031	0.188657	-13.0788	0.100818	392	#mutated->#	O00757-P09467-MDL-5q0c.pdb2-E-0-F-0.pdb	FB514S	B	A	|Low-Medium|	0
O14646-O60341-EXP-5afw.pdb1-A-0-B-0.pdb	B	A	|Low-Medium|	0	0	0	0	0	0	0	0	0	|Low|	66.6667	0	0.131646	0	-9.1	0	-8.1	0	401	|High-Medium|	0	0	0	0	0	0	0	0	0	|High|	0	0	0	0	0	0	0	0	0	#mutated->#	O14646-O60341-EXP-5afw.pdb1-A-0-B-0.pdb	RB113A	B	A	|Low-Medium|	0
O14745-P15311-MDL-2d10.pdb3-G-0-C-0.pdb	A	A	|Low-Medium|	35.6945	1.87821	0.869014	0.0985293	-10.913	0.161395	-11.1304	0.191914	46	|Low|	43.5719	2.32486	0.933825	0.0696005	-10.3318	0.15883	-10.3625	0.226941	355	|High-Medium|	0	0	0	0	0	0	0	0	0	|High|	0	0	0	0	0	0	0	0	0	#mutated->#	O14745-P15311-MDL-2d10.pdb3-G-0-C-0.pdb	FA17R	A	B	|Low-Medium|	35.6671
O14931-Q68D85-EXP-3pv6.pdb1-B-0-A-0.pdb	A	A	|Low-Medium|	34.456	1.34308	0.955498	0.053706	-11.028	0.12083	-11.232	0.11804	25	|Low|	45.9717	3.70843	0.943057	0.109526	-10.1763	0.216637	-10.1324	0.362378	376	|High-Medium|	0	0	0	0	0	0	0	0	0	|High|	0	0	0	0	0	0	0	0	0	#mutated->#	O14931-Q68D85-EXP-3pv6.pdb1-B-0-A-0.pdb	SA52R	A	B	|Low-Medium|	35.8182
O14965-Q9NQS7-MDL-4c2w.pdb1-A-0-D-0.pdb	A	A	|Low-Medium|	0	0	0	0	0	0	0	0	0	|Low|	0	0	0	0	0	0	0	0	0	|High-Medium|	24.1355	1.07828	1.00085	0.0249739	-12.0244	0.133796	-12.2469	0.108612	401	|High|	0	0	0	0	0	0	0	0	0	#mutated->#	O14965-Q9NQS7-MDL-4c2w.pdb1-A-0-D-0.pdb	GA71L	A	B	|Low-Medium|	0
O15105-Q96PU5-EXP-2lty.pdb1-B-0-A-0.pdb	A	A	|Low-Medium|	0	0	0	0	0	0	0	0	0	|Low|	52.2813	5.0611	0.780931	0.20059	-9.82294	0.278338	-9.51771	0.487043	401	|High-Medium|	0	0	0	0	0	0	0	0	0	|High|	0	0	0	0	0	0	0	0	0	#mutated->#	O15105-Q96PU5-EXP-2lty.pdb1-B-0-A-0.pdb	PA208A	A	B	|Low-Medium|	35.5898
O15169-P49841-EXP-4nm3.pdb1-B-0-A-0.pdb	A	A	|Low-Medium|	0	0	0	0	0	0	0	0	0	|Low|	60.5041	7.75586	0.451337	0.292766	-9.41546	0.361608	-8.73017	0.748473	401	|High-Medium|	0	0	0	0	0	0	0	0	0	|High|	0	0	0	0	0	0	0	0	0	#mutated->#	O15169-P49841-EXP-4nm3.pdb1-B-0-A-0.pdb	LA392P	A	B	|Low-Medium|	87.9762
O15553-Q9ULZ3-MDL-2n1f.pdb1-L-0-K-0.pdb	B	A	|Low-Medium|	33.3333	0	0.994026	0	-11.1	0	-11.4	0	1	|Low|	64.4621	7.72095	0.284545	0.275053	-9.22652	0.360912	-8.34268	0.747161	396	|High-Medium|	0	0	0	0	0	0	0	0	0	|High|	0	0	0	0	0	0	0	0	0	#mutated->#	O15553-Q9ULZ3-MDL-2n1f.pdb1-L-0-K-0.pdb	EB93A	B	A	|Low-Medium|	0
O43157-P61587-MDL-3su8.pdb1-X-0-A-0.pdb	B	A	|Low-Medium|	36.6697	1.40756	0.817122	0.101426	-10.8364	0.112006	-11.0182	0.166242	11	|Low|	44.6152	3.72245	0.920676	0.0901129	-10.2726	0.223184	-10.2487	0.362774	390	|High-Medium|	0	0	0	0	0	0	0	0	0	|High|	0	0	0	0	0	0	0	0	0	#mutated->#	O43157-P61587-MDL-3su8.pdb1-X-0-A-0.pdb	LB641R	B	A	|Low-Medium|	36.999
O43157-Q92730-EXP-2rex.pdb5-C-0-D-0.pdb	B	A	|Low-Medium|	34.3333	0	0.990554	0	-11	0	-11.3	0	1	|Low|	43.7267	3.70594	0.900453	0.0751014	-10.3387	0.231316	-10.3477	0.35688	400	|High-Medium|	0	0	0	0	0	0	0	0	0	|High|	0	0	0	0	0	0	0	0	0	#mutated->#	O43157-Q92730-EXP-2rex.pdb5-C-0-D-0.pdb	EB48A	B	A	|Low-Medium|	35
O43752-Q9UID3-EXP-4j2c.pdb1-A-0-B-0.pdb	B	A	|Low-Medium|	93.9621	3.23982	0.0014	0	-8.12923	0.106127	-5.4912	0.298453	284	|Low|	82.0723	4.41769	0.00620612	0.00848862	-8.52479	0.144977	-6.63675	0.421328	117	|High-Medium|	0	0	0	0	0	0	0	0	0	|High|	0	0	0	0	0	0	0	0	0	#mutated->#	O43752-Q9UID3-EXP-4j2c.pdb1-A-0-B-0.pdb	YB40A	B	A	|Low-Medium|	93.1544
O60499-Q9UID3-MDL-4j2c.pdb2-C-0-D-0.pdb	B	A	|Low-Medium|	91.1059	2.07098	0.0014	0	-8.24348	0.0650171	-5.74638	0.184097	138	|Low|	79.6838	4.74728	0.015008	0.0343565	-8.6251	0.180694	-6.87452	0.461822	263	|High-Medium|	0	0	0	0	0	0	0	0	0	|High|	0	0	0	0	0	0	0	0	0	#mutated->#	O60499-Q9UID3-MDL-4j2c.pdb2-C-0-D-0.pdb	LB110A	B	A	|Low-Medium|	90.6118
O60880-Q14155-MDL-1m27.pdb1-A-0-C-0.pdb	A	A	|Low-Medium|	89.2681	1.71074	0.0014	0	-8.29444	0.0531545	-5.94167	0.162788	36	|Low|	71.3787	5.93203	0.083721	0.0991979	-8.93534	0.243453	-7.66603	0.577506	365	|High-Medium|	0	0	0	0	0	0	0	0	0	|High|	0	0	0	0	0	0	0	0	0	#mutated->#	O60880-Q14155-MDL-1m27.pdb1-A-0-C-0.pdb	RA78A	A	B	|Low-Medium|	87.9464
O75154-P62491-EXP-2d7c.pdb2-D-0-B-0.pdb	A	A	|Low-Medium|	35.7576	1.04968	0.908334	0.0661871	-10.9333	0.057735	-11.1333	0.057735	3	|Low|	47.3783	3.96996	0.923994	0.0889936	-10.1063	0.216732	-10	0.397524	396	|High-Medium|	26.6667	2.69372	0.901151	0.159055	-11.75	0.353553	-12	0.282843	2	|High|	0	0	0	0	0	0	0	0	0	#mutated->#	O75154-P62491-EXP-2d7c.pdb2-D-0-B-0.pdb	DA739A	A	B	|Low-Medium|	34.3569
O75164-Q16695-EXP-4v2w.pdb1-A-0-C-0.pdb	A	A	|Low-Medium|	0	0	0	0	0	0	0	0	0	|Low|	39	0	0.753602	0	-10.7	0	-10.8	0	401	|High-Medium|	0	0	0	0	0	0	0	0	0	|High|	0	0	0	0	0	0	0	0	0	#mutated->#	O75164-Q16695-EXP-4v2w.pdb1-A-0-C-0.pdb	GA170A	A	B	|Low-Medium|	0
O75689-Q9NQT8-EXP-3fm8.pdb2-D-0-B-0.pdb	A	A	|Low-Medium|	36.7396	2.05389	0.787345	0.124322	-10.8	0.173205	-11.02	0.216795	5	|Low|	44.5449	3.26673	0.931449	0.0696293	-10.2803	0.211842	-10.2699	0.316757	396	|High-Medium|	0	0	0	0	0	0	0	0	0	|High|	0	0	0	0	0	0	0	0	0	#mutated->#	O75689-Q9NQT8-EXP-3fm8.pdb2-D-0-B-0.pdb	YA211R	A	B	|Low-Medium|	36.7302
O75832-P43686-EXP-5vhf.pdb1-G-0-D-0.pdb	B	A	|Low-Medium|	29.7705	0.147949	0.728056	0.0168373	-11.4	0	-11.7	0	6	|Low|	0	0	0	0	0	0	0	0	0	|High-Medium|	28.5761	0.594417	0.783832	0.0516031	-11.5385	0.0678736	-11.8048	0.058337	395	|High|	0	0	0	0	0	0	0	0	0	#mutated->#	O75832-P43686-EXP-5vhf.pdb1-G-0-D-0.pdb	DB359A	B	A	|Low-Medium|	30.052
O76015-P35908-MDL-4zry.pdb1-A-0-B-0.pdb	B	A	|Low-Medium|	0	0	0	0	0	0	0	0	0	|Low|	0	0	0	0	0	0	0	0	0	|High-Medium|	19.0769	0	0.669191	0	-12.7	0	-12.7	0	1	|High|	13.3508	1.22585	0.895403	0.0941341	-13.7317	0.257259	-13.2843	0.121093	400	#mutated->#	O76015-P35908-MDL-4zry.pdb1-A-0-B-0.pdb	IB195N	B	A	|Low-Medium|	0
O95630-Q9Y3E7-EXP-2xze.pdb2-A-0-Q-0.pdb	B	A	|Low-Medium|	0	0	0	0	0	0	0	0	0	|Low|	46.3892	2.48225	0.970441	0.0611653	-10.1574	0.154117	-10.0918	0.234002	401	|High-Medium|	0	0	0	0	0	0	0	0	0	|High|	0	0	0	0	0	0	0	0	0	#mutated->#	O95630-Q9Y3E7-EXP-2xze.pdb2-A-0-Q-0.pdb	RB216A	B	A	|Low-Medium|	0
O95835-P35240-MDL-4zrk.pdb3-G-0-C-0.pdb	A	A	|Low-Medium|	36.3676	1.14827	0.861511	0.103058	-10.85	0.0707107	-11.05	0.0707107	2	|Low|	47.5445	3.38034	0.941062	0.0709008	-10.0759	0.209624	-9.97644	0.335049	399	|High-Medium|	0	0	0	0	0	0	0	0	0	|High|	0	0	0	0	0	0	0	0	0	#mutated->#	O95835-P35240-MDL-4zrk.pdb3-G-0-C-0.pdb	LA17P	A	B	|Low-Medium|	36.4356
P00533-Q9UJM3-EXP-4zjv.pdb1-A-0-C-0.pdb	B	A	|Low-Medium|	0	0	0	0	0	0	0	0	0	|Low|	0	0	0	0	0	0	0	0	0	|High-Medium|	21.1438	1.1097	0.872547	0.0981099	-12.4083	0.157381	-12.5307	0.108438	400	|High|	16.8561	0	0.631422	0	-13.1	0	-12.9	0	1	#mutated->#	P00533-Q9UJM3-EXP-4zjv.pdb1-A-0-C-0.pdb	YB358A	B	A	|Low-Medium|	0
P01130-Q5SW96-MDL-3so6.pdb1-Q-0-A-0.pdb	A	A	|Low-Medium|	0	0	0	0	0	0	0	0	0	|Low|	50.3124	2.41837	0.905938	0.0812178	-9.91372	0.129176	-9.70823	0.231964	401	|High-Medium|	0	0	0	0	0	0	0	0	0	|High|	0	0	0	0	0	0	0	0	0	#mutated->#	P01130-Q5SW96-MDL-3so6.pdb1-Q-0-A-0.pdb	YA9A	A	B	|Low-Medium|	0
P01834-P18465-EXP-3vh8.pdb2-F-0-D-0.pdb	A	A	|Low-Medium|	0	0	0	0	0	0	0	0	0	|Low|	59.3724	2.08969	0.441808	0.117045	-9.48454	0.101293	-8.87082	0.205235	401	|High-Medium|	0	0	0	0	0	0	0	0	0	|High|	0	0	0	0	0	0	0	0	0	#mutated->#	P01834-P18465-EXP-3vh8.pdb2-F-0-D-0.pdb	SA8R	A	B	|Low-Medium|	0
P01892-Q9BX59-MDL-5opi.pdb1-A-0-C-0.pdb	A	A	|Low-Medium|	30.4278	0.571963	0.797946	0.0573041	-11.3605	0.0540347	-11.6346	0.061564	81	|Low|	0	0	0	0	0	0	0	0	0	|High-Medium|	26.984	1.3602	0.903485	0.0783736	-11.7109	0.150357	-11.9663	0.136865	320	|High|	0	0	0	0	0	0	0	0	0	#mutated->#	P01892-Q9BX59-MDL-5opi.pdb1-A-0-C-0.pdb	EA229K	A	B	|Low-Medium|	30.4436
P02538-Q6A162-MDL-4zry.pdb1-B-0-A-0.pdb	A	A	|Low-Medium|	0	0	0	0	0	0	0	0	0	|Low|	0	0	0	0	0	0	0	0	0	|High-Medium|	0	0	0	0	0	0	0	0	0	|High|	12.0082	0.890715	0.771891	0.132337	-14.0342	0.211672	-13.4167	0.0908027	401	#mutated->#	P02538-Q6A162-MDL-4zry.pdb1-B-0-A-0.pdb	AA95P	A	B	|Low-Medium|	0
P02776-P13501-MDD-IL8-IL8-5l2u-C-8-65-E-8-65.pdb	B	A	|Low-Medium|	50.9841	26.4579	0.658473	0.417517	-10.203	1.25586	-9.66667	2.56682	33	|Low|	49.7406	8.65459	0.805966	0.263534	-9.99195	0.459349	-9.7681	0.837892	348	|High-Medium|	27.7778	0	0.865452	0	-11.6	0	-11.9	0	2	|High|	0	0	0	0	0	0	0	0	0	#mutated->#	P02776-P13501-MDD-IL8-IL8-5l2u-C-8-65-E-8-65.pdb	EB77A	B	A	|Low-Medium|	39.0481
P05813-P53674-MDL-1oki.pdb1-A-0-B-0.pdb	B	A	|Low-Medium|	30.3078	0.356598	0.787553	0.0384428	-11.3667	0.057735	-11.6333	0.057735	3	|Low|	0	0	0	0	0	0	0	0	0	|High-Medium|	24.6568	1.5035	0.986089	0.0448044	-11.9719	0.173893	-12.1905	0.150597	398	|High|	0	0	0	0	0	0	0	0	0	#mutated->#	P05813-P53674-MDL-1oki.pdb1-A-0-B-0.pdb	SB360P	B	A	|Low-Medium|	29.872
P06730-Q13542-EXP-3am7.pdb1-A-0-B-0.pdb	B	A	|Low-Medium|	0	0	0	0	0	0	0	0	0	|Low|	47.5132	3.57505	0.935895	0.0808198	-10.0988	0.21383	-9.97282	0.334566	401	|High-Medium|	0	0	0	0	0	0	0	0	0	|High|	0	0	0	0	0	0	0	0	0	#mutated->#	P06730-Q13542-EXP-3am7.pdb1-A-0-B-0.pdb	YB54A	B	A	|Low-Medium|	0
P07900-Q9H6T3-EXP-4cgv.pdb3-E-0-C-0.pdb	B	A	|Low-Medium|	0	0	0	0	0	0	0	0	0	|Low|	49.953	6.16547	0.83121	0.244711	-9.95885	0.34326	-9.74913	0.59553	401	|High-Medium|	0	0	0	0	0	0	0	0	0	|High|	0	0	0	0	0	0	0	0	0	#mutated->#	P07900-Q9H6T3-EXP-4cgv.pdb3-E-0-C-0.pdb	NB172E	B	A	|Low-Medium|	36.2983
P08727-P35908-MDL-4zry.pdb1-A-0-B-0.pdb	B	A	|Low-Medium|	0	0	0	0	0	0	0	0	0	|Low|	0	0	0	0	0	0	0	0	0	|High-Medium|	0	0	0	0	0	0	0	0	0	|High|	12.195	1.04605	0.790703	0.140519	-13.9905	0.243023	-13.3973	0.106852	401	#mutated->#	P08727-P35908-MDL-4zry.pdb1-A-0-B-0.pdb	IB204N	B	A	|Low-Medium|	0
P10644-P17612-MDL-2qcs.pdb1-B-0-A-0.pdb	B	A	|Low-Medium|	0	0	0	0	0	0	0	0	0	|Low|	0	0	0	0	0	0	0	0	0	|High-Medium|	0	0	0	0	0	0	0	0	0	|High|	15.7082	0.51147	0.835778	0.0825497	-13.2556	0.0978503	-13.0616	0.0535859	401	#mutated->#	P10644-P17612-MDL-2qcs.pdb1-B-0-A-0.pdb	LB483R	B	A	|Low-Medium|	0
P11473-Q15788-MDL-5ow7.pdb1-A-0-B-0.pdb	A	A	|Low-Medium|	35.701	1.67908	0.878523	0.0877153	-10.9143	0.134077	-11.13	0.169731	210	|Low|	40.9475	2.63272	0.831858	0.0930673	-10.512	0.177442	-10.6194	0.260751	191	|High-Medium|	0	0	0	0	0	0	0	0	0	|High|	0	0	0	0	0	0	0	0	0	#mutated->#	P11473-Q15788-MDL-5ow7.pdb1-A-0-B-0.pdb	EA198K	A	B	|Low-Medium|	35.8016
P11474-Q9UBK2-EXP-3d24.pdb3-C-0-D-0.pdb	A	A	|Low-Medium|	35.1866	1.79924	0.90197	0.0872572	-10.9511	0.145654	-11.1763	0.179126	186	|Low|	41.6447	2.99439	0.854261	0.0979174	-10.4651	0.204008	-10.5448	0.299164	212	|High-Medium|	28.153	1.28564	0.817503	0.122886	-11.6	0.1	-11.8333	0.152753	3	|High|	0	0	0	0	0	0	0	0	0	#mutated->#	P11474-Q9UBK2-EXP-3d24.pdb3-C-0-D-0.pdb	QA262E	A	B	|Low-Medium|	35.4942
P11802-P42772-MDL-1bi7.pdb1-A-1-B-1.pdb	A	A	|Low-Medium|	30.3742	0.842537	0.787784	0.0766406	-11.3669	0.081457	-11.6382	0.0850465	178	|Low|	0	0	0	0	0	0	0	0	0	|High-Medium|	28.552	0.67576	0.785146	0.0655057	-11.5498	0.0696674	-11.8045	0.0739952	223	|High|	0	0	0	0	0	0	0	0	0	#mutated->#	P11802-P42772-MDL-1bi7.pdb1-A-1-B-1.pdb	RA20H	A	B	|Low-Medium|	30.3635
P11802-P42773-MDL-1g3n.pdb4-A-0-B-0.pdb	A	A	|Low-Medium|	35.6836	1.41167	0.893635	0.0830616	-10.9094	0.114084	-11.1231	0.141488	307	|Low|	39.7987	1.62045	0.790696	0.0755576	-10.5947	0.120364	-10.7309	0.16133	94	|High-Medium|	0	0	0	0	0	0	0	0	0	|High|	0	0	0	0	0	0	0	0	0	#mutated->#	P11802-P42773-MDL-1g3n.pdb4-A-0-B-0.pdb	RA23H	A	B	|Low-Medium|	35.9004
P13646-P35908-MDL-4zry.pdb1-A-1-B-1.pdb	B	A	|Low-Medium|	0	0	0	0	0	0	0	0	0	|Low|	0	0	0	0	0	0	0	0	0	|High-Medium|	0	0	0	0	0	0	0	0	0	|High|	13.9733	0.77459	0.959857	0.0548494	-13.5958	0.161731	-13.2249	0.0801658	401	#mutated->#	P13646-P35908-MDL-4zry.pdb1-A-1-B-1.pdb	IB204N	B	A	|Low-Medium|	0
P13746-P43632-MDL-4n8v.pdb2-D-0-I-0.pdb	B	A	|Low-Medium|	35.8194	1.41794	0.884295	0.0885886	-10.8949	0.110887	-11.1212	0.146353	311	|Low|	39.2993	0.827468	0.769027	0.0448041	-10.6344	0.0736849	-10.7867	0.0837331	90	|High-Medium|	0	0	0	0	0	0	0	0	0	|High|	0	0	0	0	0	0	0	0	0	#mutated->#	P13746-P43632-MDL-4n8v.pdb2-D-0-I-0.pdb	KB312M	B	A	|Low-Medium|	35.8259
P13747-P17693-EXP-3bze.pdb1-A-0-P-0.pdb	A	A	|Low-Medium|	0	0	0	0	0	0	0	0	0	|Low|	0	0	0	0	0	0	0	0	0	|High-Medium|	22.7205	1.08406	0.968483	0.0494977	-12.2005	0.137101	-12.3825	0.110564	400	|High|	17.6136	0	0.48148	0	-12.9	0	-12.9	0	1	#mutated->#	P13747-P17693-EXP-3bze.pdb1-A-0-P-0.pdb	DA162A	A	B	|Low-Medium|	0
P15056-Q02750-EXP-4mne.pdb1-B-0-A-0.pdb	A	A	|Low-Medium|	30.4238	0.64616	0.797528	0.0682879	-11.3714	0.0755929	-11.6429	0.0534522	7	|Low|	0	0	0	0	0	0	0	0	0	|High-Medium|	23.7435	2.33619	0.942962	0.0960277	-12.0816	0.290183	-12.2801	0.228697	386	|High|	16.7369	0.71527	0.651618	0.13703	-13.0625	0.118773	-12.95	0.0755929	8	#mutated->#	P15056-Q02750-EXP-4mne.pdb1-B-0-A-0.pdb	IA666R	A	B	|Low-Medium|	31.0263
P17693-Q13241-EXP-3cdg.pdb2-Q-0-E-0.pdb	B	A	|Low-Medium|	86.7631	9.5904	0.0276413	0.143729	-8.39333	0.465302	-6.18	0.934179	30	|Low|	75.0225	8.98593	0.0825847	0.207471	-8.7967	0.382482	-7.32075	0.87289	212	|High-Medium|	0	0	0	0	0	0	0	0	0	|High|	0	0	0	0	0	0	0	0	0	#mutated->#	P17693-Q13241-EXP-3cdg.pdb2-Q-0-E-0.pdb	FB114A	B	A	|Low-Medium|	90.214
P17693-Q8N423-EXP-2dyp.pdb1-A-0-D-0.pdb	B	A	|Low-Medium|	33.6701	2.44382	0.922962	0.0682302	-11.0667	0.208167	-11.3	0.264575	3	|Low|	55.6187	5.16587	0.63225	0.240467	-9.63376	0.281363	-9.19386	0.495429	391	|High-Medium|	28.4343	0.928502	0.797755	0.095738	-11.55	0.0707107	-11.85	0.0707107	2	|High|	0	0	0	0	0	0	0	0	0	#mutated->#	P17693-Q8N423-EXP-2dyp.pdb1-A-0-D-0.pdb	YB38A	B	A	|Low-Medium|	0
P18465-P43629-EXP-3vh8.pdb1-A-0-G-0.pdb	B	A	|Low-Medium|	0	0	0	0	0	0	0	0	0	|Low|	0	0	0	0	0	0	0	0	0	|High-Medium|	22.5234	1.24231	0.955334	0.0529225	-12.2249	0.158356	-12.4025	0.124072	401	|High|	0	0	0	0	0	0	0	0	0	#mutated->#	P18465-P43629-EXP-3vh8.pdb1-A-0-G-0.pdb	YB200A	B	A	|Low-Medium|	0
P24928-Q9NQG5-MDL-4jxt.pdb1-B-0-A-0.pdb	B	A	|Low-Medium|	35.8218	1.96317	0.854514	0.0945418	-10.9053	0.159301	-11.1105	0.206371	38	|Low|	43.1821	2.9952	0.907575	0.0831984	-10.3647	0.199091	-10.3978	0.288348	363	|High-Medium|	0	0	0	0	0	0	0	0	0	|High|	0	0	0	0	0	0	0	0	0	#mutated->#	P24928-Q9NQG5-MDL-4jxt.pdb1-B-0-A-0.pdb	RB124A	B	A	|Low-Medium|	35.5578
P24941-P46527-EXP-6ath.pdb1-A-0-C-0.pdb	B	A	|Low-Medium|	32.3244	2.22465	0.879599	0.0813183	-11.2	0.2	-11.4455	0.20181	11	|Low|	49.0793	3.3721	0.913926	0.0464825	-9.9859	0.20888	-9.8359	0.314587	390	|High-Medium|	0	0	0	0	0	0	0	0	0	|High|	0	0	0	0	0	0	0	0	0	#mutated->#	P24941-P46527-EXP-6ath.pdb1-A-0-C-0.pdb	FB64A	B	A	|Low-Medium|	34.1774
P25054-P60953-MDD-Arm-Ras-5zhx-A-297-341-e-7-180.pdb	B	A	|Low-Medium|	35.7989	2.39421	0.824029	0.0922445	-10.9062	0.207204	-11.1232	0.237093	112	|Low|	41.3526	2.69671	0.848304	0.0919011	-10.4879	0.181522	-10.5787	0.264994	282	|High-Medium|	27.626	1.83795	0.842145	0.1057	-11.6571	0.20702	-11.9	0.191485	7	|High|	0	0	0	0	0	0	0	0	0	#mutated->#	P25054-P60953-MDD-Arm-Ras-5zhx-A-297-341-e-7-180.pdb	TB53N	B	A	|Low-Medium|	0
P26232-P35222-MDL-1dow.pdb1-A-0-B-0.pdb	B	A	|Low-Medium|	32.3495	2.12713	0.882604	0.0971452	-11.2017	0.190685	-11.4493	0.203117	353	|Low|	41.381	3.34372	0.837438	0.117675	-10.4903	0.234314	-10.5742	0.311948	31	|High-Medium|	28.7972	0.330709	0.762758	0.0364194	-11.5176	0.0392953	-11.8	0.0353553	17	|High|	0	0	0	0	0	0	0	0	0	#mutated->#	P26232-P35222-MDL-1dow.pdb1-A-0-B-0.pdb	LB220A	B	A	|Low-Medium|	32.5412
P26368-Q15637-EXP-4fxw.pdb2-C-0-D-0.pdb	B	A	|Low-Medium|	30.1471	0	0.770704	0	-11.4	0	-11.7	0	1	|Low|	0	0	0	0	0	0	0	0	0	|High-Medium|	22.0935	1.36351	0.929439	0.0666696	-12.2722	0.172778	-12.4373	0.130842	399	|High|	16.6667	0	0.669031	0	-13.1	0	-13	0	1	#mutated->#	P26368-Q15637-EXP-4fxw.pdb2-C-0-D-0.pdb	WB22A	B	A	|Low-Medium|	30.3758
P26447-P35579-EXP-4cfq.pdb1-C-0-R-0.pdb	A	A	|Low-Medium|	36.9993	0.888604	0.801966	0.0887382	-10.8	0.0816497	-11	0.0816497	4	|Low|	58.7515	6.72703	0.453055	0.269082	-9.48539	0.360048	-8.88539	0.652453	397	|High-Medium|	0	0	0	0	0	0	0	0	0	|High|	0	0	0	0	0	0	0	0	0	#mutated->#	P26447-P35579-EXP-4cfq.pdb1-C-0-R-0.pdb	VA77D	A	B	|Low-Medium|	0
P29466-Q9ULZ3-MDD-CARD-CARD-5juy-P-6-92-B-6-90.pdb	B	A	|Low-Medium|	86.6667	0	0.0014	0	-8.4	0	-6.2	0	1	|Low|	59.3293	8.6278	0.490047	0.331924	-9.47473	0.422681	-8.83763	0.835585	372	|High-Medium|	0	0	0	0	0	0	0	0	0	|High|	0	0	0	0	0	0	0	0	0	#mutated->#	P29466-Q9ULZ3-MDD-CARD-CARD-5juy-P-6-92-B-6-90.pdb	YB118F	B	A	|Low-Medium|	86.6667
P30307-P53350-EXP-3bzi.pdb1-E-0-A-0.pdb	B	A	|Low-Medium|	36.2512	1.55504	0.844467	0.0909681	-10.8689	0.136219	-11.0667	0.158114	45	|Low|	43.3517	3.33567	0.903973	0.0936544	-10.3618	0.217673	-10.3876	0.321903	356	|High-Medium|	0	0	0	0	0	0	0	0	0	|High|	0	0	0	0	0	0	0	0	0	#mutated->#	P30307-P53350-EXP-3bzi.pdb1-E-0-A-0.pdb	WB414F	B	A	|Low-Medium|	36.1903
P31040-Q9NX18-MDD-FAD_binding_2-Sdh5-6b58-C-6-131-D-7-76.pdb	B	A	|Low-Medium|	0	0	0	0	0	0	0	0	0	|Low|	65.5163	6.8838	0.233817	0.229019	-9.17855	0.318416	-8.2419	0.665951	401	|High-Medium|	0	0	0	0	0	0	0	0	0	|High|	0	0	0	0	0	0	0	0	0	#mutated->#	P31040-Q9NX18-MDD-FAD_binding_2-Sdh5-6b58-C-6-131-D-7-76.pdb	GB109R	B	A	|Low-Medium|	0
P35908-Q15323-MDL-4zry.pdb1-B-0-A-0.pdb	A	A	|Low-Medium|	0	0	0	0	0	0	0	0	0	|Low|	0	0	0	0	0	0	0	0	0	|High-Medium|	0	0	0	0	0	0	0	0	0	|High|	12.3722	0.865776	0.829355	0.120489	-13.9479	0.205065	-13.3786	0.0888195	401	#mutated->#	P35908-Q15323-MDL-4zry.pdb1-B-0-A-0.pdb	IA94N	A	B	|Low-Medium|	0
P35908-Q6A162-MDL-4zry.pdb1-B-0-A-0.pdb	A	A	|Low-Medium|	0	0	0	0	0	0	0	0	0	|Low|	0	0	0	0	0	0	0	0	0	|High-Medium|	0	0	0	0	0	0	0	0	0	|High|	12.8884	0.694381	0.903617	0.0791782	-13.8259	0.162252	-13.3297	0.0737709	401	#mutated->#	P35908-Q6A162-MDL-4zry.pdb1-B-0-A-0.pdb	IA94N	A	B	|Low-Medium|	0
P38398-Q6PJG6-EXP-4ifi.pdb2-A-0-B-0.pdb	A	A	|Low-Medium|	35.1078	2.24103	0.875531	0.0831266	-10.9587	0.188062	-11.1848	0.213924	46	|Low|	47.2543	5.66322	0.868279	0.149082	-10.1177	0.33496	-10.0115	0.550456	355	|High-Medium|	0	0	0	0	0	0	0	0	0	|High|	0	0	0	0	0	0	0	0	0	#mutated->#	P38398-Q6PJG6-EXP-4ifi.pdb2-A-0-B-0.pdb	MA1775R	A	B	|Low-Medium|	36.611
P38398-Q9BX63-EXP-1t15.pdb1-A-0-B-0.pdb	A	A	|Low-Medium|	33.3895	2.11235	0.914814	0.0853389	-11.1036	0.180916	-11.3498	0.207647	329	|Low|	40.3254	1.67315	0.817374	0.0770138	-10.5561	0.124597	-10.678	0.166602	41	|High-Medium|	28.3068	0.733851	0.80959	0.0730306	-11.5742	0.0728823	-11.8355	0.0838586	31	|High|	0	0	0	0	0	0	0	0	0	#mutated->#	P38398-Q9BX63-EXP-1t15.pdb1-A-0-B-0.pdb	MA1775K	A	B	|Low-Medium|	33.6267
P43632-Q29960-MDL-4n8v.pdb2-I-0-D-0.pdb	A	A	|Low-Medium|	34.1908	2.60763	0.873028	0.0926168	-11.037	0.217202	-11.2627	0.259574	311	|Low|	40.0397	1.14595	0.806905	0.0553546	-10.5766	0.080942	-10.7052	0.115731	77	|High-Medium|	28.0452	1.0295	0.829133	0.0699368	-11.5769	0.130089	-11.8538	0.11266	13	|High|	0	0	0	0	0	0	0	0	0	#mutated->#	P43632-Q29960-MDL-4n8v.pdb2-I-0-D-0.pdb	KA38M	A	B	|Low-Medium|	34.0385
P45973-Q5FBB7-MDL-3q6s.pdb1-D-0-F-0.pdb	A	A	|Low-Medium|	33.8903	1.96985	0.926325	0.0750199	-11.0622	0.168936	-11.2988	0.190052	331	|Low|	40.6246	2.89834	0.811744	0.0986377	-10.5338	0.194677	-10.6508	0.288381	65	|High-Medium|	28.9047	0.830403	0.74508	0.0864928	-11.54	0.0894427	-11.76	0.0894427	5	|High|	0	0	0	0	0	0	0	0	0	#mutated->#	P45973-Q5FBB7-MDL-3q6s.pdb1-D-0-F-0.pdb	WA60A	A	B	|Low-Medium|	34.0628
P49238-P78423-MDL-4xt3.pdb1-A-0-B-0.pdb	B	A	|Low-Medium|	35.9933	1.36682	0.873501	0.08691	-10.8883	0.111786	-11.0936	0.140012	282	|Low|	39.5827	1.46486	0.780605	0.0703884	-10.6084	0.107813	-10.7563	0.147084	119	|High-Medium|	0	0	0	0	0	0	0	0	0	|High|	0	0	0	0	0	0	0	0	0	#mutated->#	P49238-P78423-MDL-4xt3.pdb1-A-0-B-0.pdb	RB336A	B	A	|Low-Medium|	35.9307
P49257-Q8NI22-EXP-4ygb.pdb2-C-0-D-0.pdb	A	A	|Low-Medium|	34.1418	2.03871	0.919372	0.080931	-11.0391	0.174249	-11.2756	0.201196	307	|Low|	40.6691	2.31019	0.825565	0.094424	-10.5376	0.157341	-10.6435	0.23117	85	|High-Medium|	28.0346	1.19692	0.826504	0.0940411	-11.6	0.132288	-11.8667	0.122474	9	|High|	0	0	0	0	0	0	0	0	0	#mutated->#	P49257-Q8NI22-EXP-4ygb.pdb2-C-0-D-0.pdb	WA67S	A	B	|Low-Medium|	34.0934
P49450-P49736-MDL-5c3i.pdb3-F-0-H-0.pdb	B	A	|Low-Medium|	35.3786	1.59221	0.903256	0.0806287	-10.9359	0.12544	-11.1718	0.153998	156	|Low|	42.4326	2.72729	0.891665	0.100556	-10.4029	0.184615	-10.4712	0.270432	243	|High-Medium|	29.0441	0.519936	0.733961	0.0613666	-11.5	0	-11.75	0.0707107	2	|High|	0	0	0	0	0	0	0	0	0	#mutated->#	P49450-P49736-MDL-5c3i.pdb3-F-0-H-0.pdb	YB101A	B	A	|Low-Medium|	35.6801
P49736-P62805-EXP-5bnx.pdb1-C-0-B-0.pdb	A	A	|Low-Medium|	0	0	0	0	0	0	0	0	0	|Low|	0	0	0	0	0	0	0	0	0	|High-Medium|	22.273	2.1183	0.90621	0.103502	-12.2668	0.271058	-12.4207	0.20987	401	|High|	0	0	0	0	0	0	0	0	0	#mutated->#	P49736-P62805-EXP-5bnx.pdb1-C-0-B-0.pdb	MA117A	A	B	|Low-Medium|	0
P49917-Q96SD1-EXP-4htp.pdb1-A-0-C-0.pdb	A	A	|Low-Medium|	36.7966	1.53053	0.816536	0.150974	-10.8	0.141421	-11	0.141421	2	|Low|	44.4753	3.29738	0.929976	0.0763966	-10.2754	0.212187	-10.2692	0.314997	399	|High-Medium|	0	0	0	0	0	0	0	0	0	|High|	0	0	0	0	0	0	0	0	0	#mutated->#	P49917-Q96SD1-EXP-4htp.pdb1-A-0-C-0.pdb	FA49A	A	B	|Low-Medium|	36.3019
P51159-Q9BV36-MDL-2zet.pdb1-A-0-C-0.pdb	A	A	|Low-Medium|	0	0	0	0	0	0	0	0	0	|Low|	0	0	0	0	0	0	0	0	0	|High-Medium|	21.0505	0.869809	0.870799	0.0686569	-12.415	0.124602	-12.5392	0.0879675	401	|High|	0	0	0	0	0	0	0	0	0	#mutated->#	P51159-Q9BV36-MDL-2zet.pdb1-A-0-C-0.pdb	WA69S	A	B	|Low-Medium|	0
P51587-P60896-MDL-1miu.pdb2-A-3-B-3.pdb	A	A	|Low-Medium|	0	0	0	0	0	0	0	0	0	|Low|	0	0	0	0	0	0	0	0	0	|High-Medium|	0	0	0	0	0	0	0	0	0	|High|	11.0027	0.252229	0.600082	0.0501114	-14.2743	0.0715094	-13.5092	0.0289767	401	#mutated->#	P51587-P60896-MDL-1miu.pdb2-A-3-B-3.pdb	DA245H	A	B	|Low-Medium|	0
P51587-Q86YC2-EXP-3eu7.pdb3-X-0-A-0.pdb	A	A	|Low-Medium|	0	0	0	0	0	0	0	0	0	|Low|	66.6667	0	0.131646	0	-9.1	0	-8.1	0	401	|High-Medium|	0	0	0	0	0	0	0	0	0	|High|	0	0	0	0	0	0	0	0	0	#mutated->#	P51587-Q86YC2-EXP-3eu7.pdb3-X-0-A-0.pdb	WA31C	A	B	|Low-Medium|	86.6667
P54198-Q9Y294-EXP-2i32.pdb1-E-0-A-0.pdb	A	A	|Low-Medium|	0	0	0	0	0	0	0	0	0	|Low|	51.0566	2.85836	0.871103	0.103159	-9.88803	0.161575	-9.6419	0.279447	401	|High-Medium|	0	0	0	0	0	0	0	0	0	|High|	0	0	0	0	0	0	0	0	0	#mutated->#	P54198-Q9Y294-EXP-2i32.pdb1-E-0-A-0.pdb	IA466D	A	B	|Low-Medium|	37.5
P58753-Q6SZW1-MDD-TIR_2-TIR_2-5uzb-K-88-212-B-88-212.pdb	B	A	|Low-Medium|	89.864	3.07147	0.0014	0	-8.28571	0.102711	-5.9	0.28011	14	|Low|	64.8841	7.66949	0.27276	0.234075	-9.20285	0.333797	-8.29573	0.747154	351	|High-Medium|	0	0	0	0	0	0	0	0	0	|High|	0	0	0	0	0	0	0	0	0	#mutated->#	P58753-Q6SZW1-MDD-TIR_2-TIR_2-5uzb-K-88-212-B-88-212.pdb	GB158A	B	A	|Low-Medium|	30.1471
P60842-P78344-MDL-2vso.pdb1-A-0-E-0.pdb	B	A	|Low-Medium|	33.0423	2.11724	0.908293	0.0897131	-11.1317	0.184663	-11.3829	0.206484	281	|Low|	40.0981	3.13786	0.791283	0.130352	-10.575	0.189297	-10.675	0.320156	4	|High-Medium|	27.5863	1.46584	0.855047	0.0964355	-11.6474	0.160684	-11.9026	0.144138	116	|High|	0	0	0	0	0	0	0	0	0	#mutated->#	P60842-P78344-MDL-2vso.pdb1-A-0-E-0.pdb	FB605A	B	A	|Low-Medium|	32.7775
P61088-Q9Y4K3-EXP-3hct.pdb1-B-0-A-0.pdb	B	A	|Low-Medium|	35.99	1.63539	0.862402	0.100319	-10.8939	0.129758	-11.0909	0.172053	33	|Low|	47.4016	6.25963	0.832585	0.141197	-10.1147	0.376057	-9.99402	0.601558	368	|High-Medium|	0	0	0	0	0	0	0	0	0	|High|	0	0	0	0	0	0	0	0	0	#mutated->#	P61088-Q9Y4K3-EXP-3hct.pdb1-B-0-A-0.pdb	IB72F	B	A	|Low-Medium|	36.3145
P61326-Q9BRP8-MDD-Mago_nashi-Mago-bind-1rk8-B-6-144-C-10-35.pdb	A	A	|Low-Medium|	34.2801	2.38451	0.892857	0.0971717	-11.0276	0.198939	-11.2741	0.239561	58	|Low|	45.3879	3.51774	0.937952	0.0898185	-10.2162	0.225387	-10.1959	0.34783	340	|High-Medium|	28.0087	1.16721	0.833465	0.0987405	-11.5667	0.11547	-11.8667	0.11547	3	|High|	0	0	0	0	0	0	0	0	0	#mutated->#	P61326-Q9BRP8-MDD-Mago_nashi-Mago-bind-1rk8-B-6-144-C-10-35.pdb	DA62A	A	B	|Low-Medium|	35.0375
P61328-Q14524-EXP-4jq0.pdb1-A-0-D-0.pdb	B	A	|Low-Medium|	37.1418	0.979679	0.783138	0.0900518	-10.7937	0.0997914	-10.9938	0.0997914	16	|Low|	41.355	2.18529	0.857891	0.0834418	-10.5	0.151038	-10.5753	0.203968	385	|High-Medium|	0	0	0	0	0	0	0	0	0	|High|	0	0	0	0	0	0	0	0	0	#mutated->#	P61328-Q14524-EXP-4jq0.pdb1-A-0-D-0.pdb	EB1890K	B	A	|Low-Medium|	37.304
P62068-Q8TAF3-EXP-5cvn.pdb1-B-0-A-0.pdb	B	A	|Low-Medium|	0	0	0	0	0	0	0	0	0	|Low|	0	0	0	0	0	0	0	0	0	|High-Medium|	23.0664	1.70615	0.959193	0.0721394	-12.1628	0.215763	-12.346	0.167344	400	|High|	16.9951	0	0.603644	0	-13	0	-12.9	0	1	#mutated->#	P62068-Q8TAF3-EXP-5cvn.pdb1-B-0-A-0.pdb	KB214E	B	A	|Low-Medium|	30.0654
P62491-Q9UBF8-EXP-5c46.pdb1-F-0-E-0.pdb	B	A	|Low-Medium|	36.2425	1.43598	0.851663	0.0920475	-10.8724	0.130648	-11.0828	0.15369	29	|Low|	44.779	3.24939	0.936878	0.0757889	-10.2505	0.212607	-10.2478	0.317624	372	|High-Medium|	0	0	0	0	0	0	0	0	0	|High|	0	0	0	0	0	0	0	0	0	#mutated->#	P62491-Q9UBF8-EXP-5c46.pdb1-F-0-E-0.pdb	YB159A	B	A	|Low-Medium|	36.554
P62805-Q71DI3-EXP-1tzy.pdb1-H-0-G-0.pdb	B	A	|Low-Medium|	0	0	0	0	0	0	0	0	0	|Low|	0	0	0	0	0	0	0	0	0	|High-Medium|	18.0681	0.338028	0.523644	0.0508034	-12.863	0.0559525	-12.8296	0.0536573	54	|High|	16.729	0.631172	0.652468	0.116738	-13.0741	0.116879	-12.9591	0.0658187	347	#mutated->#	P62805-Q71DI3-EXP-1tzy.pdb1-H-0-G-0.pdb	RB63A	B	A	|Low-Medium|	0
P63010-Q5SW96-EXP-2g30.pdb1-A-0-P-0.pdb	B	A	|Low-Medium|	0	0	0	0	0	0	0	0	0	|Low|	64.7512	6.3946	0.259019	0.233135	-9.20798	0.286332	-8.31596	0.618057	401	|High-Medium|	0	0	0	0	0	0	0	0	0	|High|	0	0	0	0	0	0	0	0	0	#mutated->#	P63010-Q5SW96-EXP-2g30.pdb1-A-0-P-0.pdb	RB15A	B	A	|Low-Medium|	0
P63208-Q13309-EXP-1fs1.pdb1-D-0-C-0.pdb	B	A	|Low-Medium|	36.0185	1.72463	0.853907	0.0940448	-10.8859	0.142996	-11.1038	0.165492	78	|Low|	42.3671	3.09893	0.878801	0.0926096	-10.4155	0.207039	-10.4777	0.308369	323	|High-Medium|	0	0	0	0	0	0	0	0	0	|High|	0	0	0	0	0	0	0	0	0	#mutated->#	P63208-Q13309-EXP-1fs1.pdb1-D-0-C-0.pdb	LB117A	B	A	|Low-Medium|	0
P78324-Q08722-EXP-2jjs.pdb2-B-0-D-0.pdb	A	A	|Low-Medium|	30.6878	0	0.827956	0	-11.3	0	-11.6	0	401	|Low|	0	0	0	0	0	0	0	0	0	|High-Medium|	0	0	0	0	0	0	0	0	0	|High|	0	0	0	0	0	0	0	0	0	#mutated->#	P78324-Q08722-EXP-2jjs.pdb2-B-0-D-0.pdb	QA37L	A	B	|Low-Medium|	31.2198
P78560-Q9HB75-EXP-2of5.pdb1-B-0-H-0.pdb	A	A	|Low-Medium|	36.6215	0.782284	0.839088	0.0718268	-10.8409	0.0666125	-11.0318	0.0893701	22	|Low|	44.9861	3.85303	0.920407	0.0806608	-10.2496	0.240961	-10.2266	0.374593	379	|High-Medium|	0	0	0	0	0	0	0	0	0	|High|	0	0	0	0	0	0	0	0	0	#mutated->#	P78560-Q9HB75-EXP-2of5.pdb1-B-0-H-0.pdb	GA128R	A	B	|Low-Medium|	32.4561
P84077-Q10567-EXP-6cm9.pdb1-C-0-B-0.pdb	B	A	|Low-Medium|	31.9931	1.6494	0.893245	0.0858768	-11.2352	0.145844	-11.4815	0.155971	335	|Low|	40.6437	2.05631	0.829939	0.0944861	-10.53	0.149443	-10.65	0.206828	10	|High-Medium|	27.9171	1.12144	0.837792	0.0960363	-11.6125	0.120699	-11.8786	0.102184	56	|High|	0	0	0	0	0	0	0	0	0	#mutated->#	P84077-Q10567-EXP-6cm9.pdb1-C-0-B-0.pdb	VB88D	B	A	|Low-Medium|	32.2388
P84243-Q9NVP2-EXP-5bnx.pdb1-A-0-D-0.pdb	A	A	|Low-Medium|	0	0	0	0	0	0	0	0	0	|Low|	49.6113	1.5895	0.94032	0.0385507	-9.97107	0.100554	-9.7808	0.156542	401	|High-Medium|	0	0	0	0	0	0	0	0	0	|High|	0	0	0	0	0	0	0	0	0	#mutated->#	P84243-Q9NVP2-EXP-5bnx.pdb1-A-0-D-0.pdb	CA110E	A	B	|Low-Medium|	0
Q13426-Q9H9Q4-EXP-3rwr.pdb1-F-0-I-0.pdb	A	A	|Low-Medium|	0	0	0	0	0	0	0	0	0	|Low|	45.267	0.666133	0.988594	0.00779011	-10.2347	0.0531079	-10.193	0.0620574	401	|High-Medium|	0	0	0	0	0	0	0	0	0	|High|	0	0	0	0	0	0	0	0	0	#mutated->#	Q13426-Q9H9Q4-EXP-3rwr.pdb1-F-0-I-0.pdb	FA106E	A	B	|Low-Medium|	0
Q13485-Q15797-MDL-1u7f.pdb1-B-0-A-0.pdb	A	A	|Low-Medium|	29.5238	0	0.699434	0	-11.4	0	-11.7	0	1	|Low|	0	0	0	0	0	0	0	0	0	|High-Medium|	24.0351	1.13766	0.998581	0.0334741	-12.0382	0.135861	-12.2523	0.110569	400	|High|	0	0	0	0	0	0	0	0	0	#mutated->#	Q13485-Q15797-MDL-1u7f.pdb1-B-0-A-0.pdb	DA38H	A	B	|Low-Medium|	29.813
Q13618-Q8IWE4-MDL-3tdu.pdb1-C-0-A-0.pdb	B	A	|Low-Medium|	35.6779	1.93104	0.868858	0.0722494	-10.94	0.150555	-11.14	0.177639	10	|Low|	46.9105	4.10693	0.925815	0.10693	-10.1355	0.248668	-10.0414	0.399001	391	|High-Medium|	0	0	0	0	0	0	0	0	0	|High|	0	0	0	0	0	0	0	0	0	#mutated->#	Q13618-Q8IWE4-MDL-3tdu.pdb1-C-0-A-0.pdb	DB229A	B	A	|Low-Medium|	35.721
Q15223-Q96NY8-MDL-5b21.pdb1-A-0-B-0.pdb	A	A	|Low-Medium|	31.197	1.29869	0.852721	0.0931331	-11.2908	0.118688	-11.5599	0.127772	152	|Low|	0	0	0	0	0	0	0	0	0	|High-Medium|	27.549	1.44722	0.858641	0.0954345	-11.6518	0.15634	-11.9056	0.150163	249	|High|	0	0	0	0	0	0	0	0	0	#mutated->#	Q15223-Q96NY8-MDL-5b21.pdb1-A-0-B-0.pdb	FA99D	A	B	|Low-Medium|	31.1229
Q15291-Q8NEZ4-EXP-5f6k.pdb1-D-0-C-0.pdb	A	A	|Low-Medium|	34.6605	2.02839	0.90956	0.0956343	-10.9859	0.169874	-11.2291	0.196904	213	|Low|	41.6484	3.60357	0.838663	0.0962447	-10.4629	0.224379	-10.5511	0.355686	186	|High-Medium|	28.4523	0.168362	0.801014	0.017439	-11.55	0.0707107	-11.8	0	2	|High|	0	0	0	0	0	0	0	0	0	#mutated->#	Q15291-Q8NEZ4-EXP-5f6k.pdb1-D-0-C-0.pdb	EA347A	A	B	|Low-Medium|	34.6315
Q15554-Q9NYB0-EXP-3k6g.pdb2-E-0-B-0.pdb	A	A	|Low-Medium|	32.0499	1.73484	0.891854	0.0880035	-11.2228	0.158428	-11.4772	0.164207	355	|Low|	38.0952	0	0.701325	0	-10.7	0	-10.9	0	1	|High-Medium|	28.4826	0.588563	0.793877	0.0589102	-11.5578	0.0690484	-11.8267	0.0617914	45	|High|	0	0	0	0	0	0	0	0	0	#mutated->#	Q15554-Q9NYB0-EXP-3k6g.pdb2-E-0-B-0.pdb	LA288E	A	B	|Low-Medium|	32.3258
Q16181-Q8IYM1-MDL-3t5d.pdb1-A-0-C-0.pdb	B	A	|Low-Medium|	0	0	0	0	0	0	0	0	0	|Low|	0	0	0	0	0	0	0	0	0	|High-Medium|	19.8945	0.673769	0.762614	0.0713305	-12.5778	0.0973713	-12.6471	0.0699857	401	|High|	0	0	0	0	0	0	0	0	0	#mutated->#	Q16181-Q8IYM1-MDL-3t5d.pdb1-A-0-C-0.pdb	DB418N	B	A	|Low-Medium|	0
Q5TA45-Q9NV88-EXP-5v8w.pdb4-H-0-G-0.pdb	A	A	|Low-Medium|	32.5923	2.01692	0.900621	0.0893486	-11.171	0.174055	-11.4272	0.197447	334	|Low|	39.7964	2.38673	0.782557	0.102267	-10.5917	0.172986	-10.7333	0.246183	12	|High-Medium|	28.4578	0.792374	0.793022	0.0743485	-11.56	0.0852013	-11.8145	0.0848052	55	|High|	0	0	0	0	0	0	0	0	0	#mutated->#	Q5TA45-Q9NV88-EXP-5v8w.pdb4-H-0-G-0.pdb	EA581R	A	B	|Low-Medium|	32.5025
Q5VW32-Q9NZZ3-EXP-3um2.pdb1-A-0-B-0.pdb	A	A	|Low-Medium|	0	0	0	0	0	0	0	0	0	|Low|	51.3917	4.9434	0.832039	0.194438	-9.87007	0.263633	-9.60324	0.476775	401	|High-Medium|	0	0	0	0	0	0	0	0	0	|High|	0	0	0	0	0	0	0	0	0	#mutated->#	Q5VW32-Q9NZZ3-EXP-3um2.pdb1-A-0-B-0.pdb	YA348A	A	B	|Low-Medium|	37.2025
Q86U44-Q9HCE5-EXP-5il2.pdb1-A-0-B-0.pdb	A	A	|Low-Medium|	0	0	0	0	0	0	0	0	0	|Low|	0	0	0	0	0	0	0	0	0	|High-Medium|	19.0083	0.74788	0.653448	0.0954623	-12.7106	0.116036	-12.7366	0.0777022	303	|High|	16.2491	0.91045	0.732429	0.151684	-13.1633	0.173138	-13.0092	0.0920407	98	#mutated->#	Q86U44-Q9HCE5-EXP-5il2.pdb1-A-0-B-0.pdb	YA406C	A	B	|Low-Medium|	0
Q8WXH0-Q9UH99-EXP-4dxs.pdb1-B-0-A-0.pdb	A	A	|Low-Medium|	35.9061	1.28921	0.882595	0.0749311	-10.8881	0.104854	-11.1085	0.133085	353	|Low|	40.4524	3.18112	0.796145	0.0904337	-10.5542	0.20727	-10.675	0.315217	48	|High-Medium|	0	0	0	0	0	0	0	0	0	|High|	0	0	0	0	0	0	0	0	0	#mutated->#	Q8WXH0-Q9UH99-EXP-4dxs.pdb1-B-0-A-0.pdb	LA6876A	A	B	|Low-Medium|	36.0264
Q96CG3-Q9Y4K3-EXP-6a33.pdb1-I-0-A-0.pdb	A	A	|Low-Medium|	0	0	0	0	0	0	0	0	0	|Low|	58.2766	6.71276	0.51788	0.295002	-9.51587	0.339079	-8.95013	0.650044	397	|High-Medium|	0	0	0	0	0	0	0	0	0	|High|	0	0	0	0	0	0	0	0	0	#mutated->#	Q96CG3-Q9Y4K3-EXP-6a33.pdb1-I-0-A-0.pdb	EA178A	A	B	|Low-Medium|	37.7778
Q96QK1-Q9UBQ0-EXP-5osi.pdb2-E-0-D-0.pdb	A	A	|Low-Medium|	0	0	0	0	0	0	0	0	0	|Low|	0	0	0	0	0	0	0	0	0	|High-Medium|	19.2263	1.20445	0.670913	0.131216	-12.6825	0.176276	-12.7171	0.118568	240	|High|	16.598	0.917609	0.667353	0.149061	-13.1	0.168449	-12.972	0.0881839	161	#mutated->#	Q96QK1-Q9UBQ0-EXP-5osi.pdb2-E-0-D-0.pdb	HA769A	A	B	|Low-Medium|	0
Q96T58-Q9Y618-EXP-2rt5.pdb1-A-0-B-0.pdb	A	A	|Low-Medium|	37.1167	1.1258	0.785563	0.106709	-10.775	0.0957427	-10.975	0.0957427	4	|Low|	45.7461	2.85234	0.957237	0.0477013	-10.2005	0.179926	-10.1524	0.277754	397	|High-Medium|	0	0	0	0	0	0	0	0	0	|High|	0	0	0	0	0	0	0	0	0	#mutated->#	Q96T58-Q9Y618-EXP-2rt5.pdb1-A-0-B-0.pdb	KA3516A	A	B	|Low-Medium|	36.4489
Q9BUL8-Q9P289-EXP-4geh.pdb2-C-0-D-0.pdb	A	A	|Low-Medium|	0	0	0	0	0	0	0	0	0	|Low|	0	0	0	0	0	0	0	0	0	|High-Medium|	23.0374	1.38689	0.970708	0.0665522	-12.1603	0.176774	-12.3494	0.135299	401	|High|	0	0	0	0	0	0	0	0	0	#mutated->#	Q9BUL8-Q9P289-EXP-4geh.pdb2-C-0-D-0.pdb	MA26E	A	B	|Low-Medium|	0
Q9C005-Q9UBL3-EXP-6e2h.pdb1-F-0-D-1.pdb	A	A	|Low-Medium|	34.3579	2.25727	0.901182	0.0821686	-11.0226	0.178344	-11.2645	0.222933	31	|Low|	49.1032	7.58078	0.801815	0.254422	-10.019	0.423375	-9.82123	0.737546	358	|High-Medium|	26.5212	2.21804	0.898216	0.0907767	-11.7417	0.267848	-12.025	0.226134	12	|High|	0	0	0	0	0	0	0	0	0	#mutated->#	Q9C005-Q9UBL3-EXP-6e2h.pdb1-F-0-D-1.pdb	LA69D	A	B	|Low-Medium|	32.9914
Q9HD34-Q9Y697-EXP-5wgb.pdb1-B-0-A-0.pdb	A	A	|Low-Medium|	35.3639	1.90221	0.888401	0.0988758	-10.9394	0.153987	-11.1697	0.19443	33	|Low|	44.6865	3.43619	0.929183	0.0749616	-10.2672	0.22248	-10.2489	0.333494	366	|High-Medium|	28.8312	0.367342	0.75937	0.0414534	-11.5	0	-11.8	0	2	|High|	0	0	0	0	0	0	0	0	0	#mutated->#	Q9HD34-Q9Y697-EXP-5wgb.pdb1-B-0-A-0.pdb	QA69A	A	B	|Low-Medium|	34.1308
Q9NPI6-Q9NPJ4-EXP-4b6h.pdb1-A-0-C-0.pdb	B	A	|Low-Medium|	36.867	1.34261	0.799801	0.104684	-10.7897	0.126335	-10.9966	0.145118	29	|Low|	48.8148	4.40682	0.8928	0.120913	-10.0204	0.263732	-9.85134	0.428529	372	|High-Medium|	0	0	0	0	0	0	0	0	0	|High|	0	0	0	0	0	0	0	0	0	#mutated->#	Q9NPI6-Q9NPJ4-EXP-4b6h.pdb1-A-0-C-0.pdb	KB109A	B	A	|Low-Medium|	36.7172
[truncated: 38 more columns]

## Sheet: 1129
x	x	x	x	x	x	x	x	x	x	x	x	x	x	x	x	x	x	x	x	x	x	x	x	x	x	x	x	x	x	x	x	x	x	x	x	x	x	x	x	x	x	x	x	x	x	x	x	x	x
P04626-Q99952-EXP-4gfu.pdb1-F-0-A-0.pdb	B	B	|Low-Medium|	36.6694	1.24444	0.83273	0.120248	-10.85	0.0707107	-11	0.141421	2	|Low|	44.0264	1.83513	0.953275	0.0462987	-10.3075	0.12214	-10.312	0.176668	399	|High-Medium|	0	0	0	0	0	0	0	0	0	|High|	0	0	0	0	0	0	0	0	0	#mutated->#	P04626-Q99952-EXP-4gfu.pdb1-F-0-A-0.pdb	DB64A	B	A	|Low-Medium|	0
P04637-Q9NRG4-EXP-3tg5.pdb1-B-0-A-0.pdb	A	B	|Low-Medium|	90.4762	0	0.0014	0	-8.2	0	-5.8	0	4	|Low|	75.8546	3.38435	0.0219298	0.0314179	-8.72872	0.121154	-7.23275	0.3411	397	|High-Medium|	0	0	0	0	0	0	0	0	0	|High|	0	0	0	0	0	0	0	0	0	#mutated->#	P04637-Q9NRG4-EXP-3tg5.pdb1-B-0-A-0.pdb	KA370R	A	B	|Low-Medium|	90.4762
Q86U44-Q9HCE5-EXP-5il2.pdb1-A-0-B-0.pdb	A	B	|Low-Medium|	0	0	0	0	0	0	0	0	0	|Low|	0	0	0	0	0	0	0	0	0	|High-Medium|	19.0083	0.74788	0.653448	0.0954623	-12.7106	0.116036	-12.7366	0.0777022	303	|High|	16.2491	0.91045	0.732429	0.151684	-13.1633	0.173138	-13.0092	0.0920407	98	#mutated->#	Q86U44-Q9HCE5-EXP-5il2.pdb1-A-0-B-0.pdb	WA475A	A	B	|Low-Medium|	0
[truncated: 38 more columns]

## Sheet: 1130
x	x	x	x	x	x	x	x	x	x	x	x	x	x	x	x	x	x	x	x	x	x	x	x	x	x	x	x	x	x	x	x	x	x	x	x	x	x	x	x	x	x	x	x	x	x	x	x	x	x
P04626-Q99952-EXP-4gfu.pdb1-F-0-A-0.pdb	B	A	|Low-Medium|	36.6694	1.24444	0.83273	0.120248	-10.85	0.0707107	-11	0.141421	2	|Low|	44.0264	1.83513	0.953275	0.0462987	-10.3075	0.12214	-10.312	0.176668	399	|High-Medium|	0	0	0	0	0	0	0	0	0	|High|	0	0	0	0	0	0	0	0	0	#mutated->#	P04626-Q99952-EXP-4gfu.pdb1-F-0-A-0.pdb	PB272M	B	A	|Low-Medium|	37.0739
P17612-P53667-MDD-Pkinase-Pkinase_Tyr-4fk3-A-457-714-B-457-714.pdb	B	A	|Low-Medium|	33.5845	1.63654	0.947689	0.0655866	-11.0885	0.137543	-11.3302	0.158468	401	|Low|	0	0	0	0	0	0	0	0	0	|High-Medium|	0	0	0	0	0	0	0	0	0	|High|	0	0	0	0	0	0	0	0	0	#mutated->#	P17612-P53667-MDD-Pkinase-Pkinase_Tyr-4fk3-A-457-714-B-457-714.pdb	SB505A	B	A	|Low-Medium|	0
P62805-Q86UY6-EXP-4u9w.pdb2-E-0-B-0.pdb	B	A	|Low-Medium|	32.5534	1.58388	0.9254	0.0719992	-11.1753	0.141756	-11.4285	0.152012	396	|Low|	39.084	0.124231	0.758316	0.00697544	-10.64	0.0547723	-10.8	0	5	|High-Medium|	0	0	0	0	0	0	0	0	0	|High|	0	0	0	0	0	0	0	0	0	#mutated->#	P62805-Q86UY6-EXP-4u9w.pdb2-E-0-B-0.pdb	YB136A	B	A	|Low-Medium|	31.4267
P62877-Q15843-EXP-4p5o.pdb1-B-0-K-0.pdb	B	A	|Low-Medium|	0	0	0	0	0	0	0	0	0	|Low|	52.0274	3.53208	0.824939	0.161234	-9.82195	0.195748	-9.54788	0.338159	401	|High-Medium|	0	0	0	0	0	0	0	0	0	|High|	0	0	0	0	0	0	0	0	0	#mutated->#	P62877-Q15843-EXP-4p5o.pdb1-B-0-K-0.pdb	LB8A	B	A	|Low-Medium|	0
[truncated: 38 more columns]

## Sheet: 1133
x	x	x	x	x	x	x	x	x	x	x	x	x	x	x	x	x	x	x	x	x	x	x	x	x	x	x	x	x	x	x	x	x	x	x	x	x	x	x	x	x	x	x	x	x	x	x	x	x	x
A6ND01-Q8IYV9-EXP-5f4e.pdb1-B-0-A-0.pdb	B	A	|Low-Medium|	31.1009	1.17506	0.850398	0.0992795	-11.3061	0.106524	-11.5652	0.118312	66	|Low|	0	0	0	0	0	0	0	0	0	|High-Medium|	27.2448	1.29613	0.887286	0.0802445	-11.6812	0.143434	-11.9409	0.126322	335	|High|	0	0	0	0	0	0	0	0	0	#mutated->#	A6ND01-Q8IYV9-EXP-5f4e.pdb1-B-0-A-0.pdb	RB160E	B	A	|Low-Medium|	31.4593
O00255-P17535-EXP-3u86.pdb1-A-0-B-0.pdb	A	A	|Low-Medium|	0	0	0	0	0	0	0	0	0	|Low|	0	0	0	0	0	0	0	0	0	|High-Medium|	24.0272	0.872202	1.00525	0.0114729	-12.0379	0.0980286	-12.2499	0.0857685	401	|High|	0	0	0	0	0	0	0	0	0	#mutated->#	O00255-P17535-EXP-3u86.pdb1-A-0-B-0.pdb	MA278W	A	B	|Low-Medium|	0
O00255-Q03164-EXP-4gq6.pdb1-A-0-B-0.pdb	A	A	|Low-Medium|	0	0	0	0	0	0	0	0	0	|Low|	0	0	0	0	0	0	0	0	0	|High-Medium|	25.4904	0.94087	0.987672	0.0277993	-11.8726	0.109525	-12.1052	0.0948552	401	|High|	0	0	0	0	0	0	0	0	0	#mutated->#	O00255-Q03164-EXP-4gq6.pdb1-A-0-B-0.pdb	YA319A	A	B	|Low-Medium|	29.8462
O00444-Q8TEP8-EXP-4n7z.pdb1-A-1-B-1.pdb	A	A	|Low-Medium|	0	0	0	0	0	0	0	0	0	|Low|	0	0	0	0	0	0	0	0	0	|High-Medium|	20.1806	1.56507	0.768775	0.134857	-12.5465	0.218229	-12.624	0.156272	387	|High|	17.207	0.434304	0.56146	0.085615	-12.9786	0.0699293	-12.9143	0.0363137	14	#mutated->#	O00444-Q8TEP8-EXP-4n7z.pdb1-A-1-B-1.pdb	RA684A	A	B	|Low-Medium|	0
O14745-P15311-MDL-2d10.pdb3-G-0-C-0.pdb	A	A	|Low-Medium|	35.6945	1.87821	0.869014	0.0985293	-10.913	0.161395	-11.1304	0.191914	46	|Low|	43.5719	2.32486	0.933825	0.0696005	-10.3318	0.15883	-10.3625	0.226941	355	|High-Medium|	0	0	0	0	0	0	0	0	0	|High|	0	0	0	0	0	0	0	0	0	#mutated->#	O14745-P15311-MDL-2d10.pdb3-G-0-C-0.pdb	WA10A	A	B	|Low-Medium|	35.7447
O14931-Q68D85-EXP-3pv6.pdb1-B-0-A-0.pdb	A	A	|Low-Medium|	34.456	1.34308	0.955498	0.053706	-11.028	0.12083	-11.232	0.11804	25	|Low|	45.9717	3.70843	0.943057	0.109526	-10.1763	0.216637	-10.1324	0.362378	376	|High-Medium|	0	0	0	0	0	0	0	0	0	|High|	0	0	0	0	0	0	0	0	0	#mutated->#	O14931-Q68D85-EXP-3pv6.pdb1-B-0-A-0.pdb	LA113A	A	B	|Low-Medium|	34.9491
O15105-P46937-EXP-2ltw.pdb1-B-0-A-0.pdb	A	A	|Low-Medium|	0	0	0	0	0	0	0	0	0	|Low|	60.7393	3.83904	0.385975	0.180975	-9.38055	0.184176	-8.702	0.373224	401	|High-Medium|	0	0	0	0	0	0	0	0	0	|High|	0	0	0	0	0	0	0	0	0	#mutated->#	O15105-P46937-EXP-2ltw.pdb1-B-0-A-0.pdb	PA207A	A	B	|Low-Medium|	86.6667
O15553-Q9ULZ3-MDL-2n1f.pdb1-L-0-K-0.pdb	B	A	|Low-Medium|	33.3333	0	0.994026	0	-11.1	0	-11.4	0	1	|Low|	64.4621	7.72095	0.284545	0.275053	-9.22652	0.360912	-8.34268	0.747161	396	|High-Medium|	0	0	0	0	0	0	0	0	0	|High|	0	0	0	0	0	0	0	0	0	#mutated->#	O15553-Q9ULZ3-MDL-2n1f.pdb1-L-0-K-0.pdb	DB90A	B	A	|Low-Medium|	0
O75154-P62491-EXP-2d7c.pdb2-D-0-B-0.pdb	A	A	|Low-Medium|	35.7576	1.04968	0.908334	0.0661871	-10.9333	0.057735	-11.1333	0.057735	3	|Low|	47.3783	3.96996	0.923994	0.0889936	-10.1063	0.216732	-10	0.397524	396	|High-Medium|	26.6667	2.69372	0.901151	0.159055	-11.75	0.353553	-12	0.282843	2	|High|	0	0	0	0	0	0	0	0	0	#mutated->#	O75154-P62491-EXP-2d7c.pdb2-D-0-B-0.pdb	EA747A	A	B	|Low-Medium|	33.683
P01834-P18465-EXP-3vh8.pdb2-F-0-D-0.pdb	A	A	|Low-Medium|	0	0	0	0	0	0	0	0	0	|Low|	59.3724	2.08969	0.441808	0.117045	-9.48454	0.101293	-8.87082	0.205235	401	|High-Medium|	0	0	0	0	0	0	0	0	0	|High|	0	0	0	0	0	0	0	0	0	#mutated->#	P01834-P18465-EXP-3vh8.pdb2-F-0-D-0.pdb	SA8L	A	B	|Low-Medium|	0
P01892-Q9BX59-MDL-5opi.pdb1-A-0-C-0.pdb	A	A	|Low-Medium|	30.4278	0.571963	0.797946	0.0573041	-11.3605	0.0540347	-11.6346	0.061564	81	|Low|	0	0	0	0	0	0	0	0	0	|High-Medium|	26.984	1.3602	0.903485	0.0783736	-11.7109	0.150357	-11.9663	0.136865	320	|High|	0	0	0	0	0	0	0	0	0	#mutated->#	P01892-Q9BX59-MDL-5opi.pdb1-A-0-C-0.pdb	EA128R	A	B	|Low-Medium|	30.4208
P04637-Q07817-EXP-2mej.pdb1-B-0-A-0.pdb	A	A	|Low-Medium|	34.8835	2.00685	0.902012	0.0894118	-10.9781	0.170319	-11.2021	0.197425	374	|Low|	38.327	0.347008	0.714762	0.0199439	-10.692	0.0276887	-10.884	0.0374166	25	|High-Medium|	28.0016	0.179534	0.845182	0.0166019	-11.6	0	-11.9	0	2	|High|	0	0	0	0	0	0	0	0	0	#mutated->#	P04637-Q07817-EXP-2mej.pdb1-B-0-A-0.pdb	KA120E	A	B	|Low-Medium|	35.1733
P05230-P11362-EXP-1evt.pdb1-B-0-D-0.pdb	A	A	|Low-Medium|	31.6089	0.906442	0.897995	0.0595812	-11.252	0.0852158	-11.5189	0.088988	396	|Low|	0	0	0	0	0	0	0	0	0	|High-Medium|	29.0545	0.302171	0.733494	0.0349102	-11.5	0	-11.78	0.0447214	5	|High|	0	0	0	0	0	0	0	0	0	#mutated->#	P05230-P11362-EXP-1evt.pdb1-B-0-D-0.pdb	NA95A	A	B	|Low-Medium|	30.9581
P06730-Q13542-EXP-3am7.pdb1-A-0-B-0.pdb	B	A	|Low-Medium|	0	0	0	0	0	0	0	0	0	|Low|	47.5132	3.57505	0.935895	0.0808198	-10.0988	0.21383	-9.97282	0.334566	401	|High-Medium|	0	0	0	0	0	0	0	0	0	|High|	0	0	0	0	0	0	0	0	0	#mutated->#	P06730-Q13542-EXP-3am7.pdb1-A-0-B-0.pdb	YB54A	B	A	|Low-Medium|	0
P11474-Q9UBK2-EXP-3d24.pdb3-C-0-D-0.pdb	A	A	|Low-Medium|	35.1866	1.79924	0.90197	0.0872572	-10.9511	0.145654	-11.1763	0.179126	186	|Low|	41.6447	2.99439	0.854261	0.0979174	-10.4651	0.204008	-10.5448	0.299164	212	|High-Medium|	28.153	1.28564	0.817503	0.122886	-11.6	0.1	-11.8333	0.152753	3	|High|	0	0	0	0	0	0	0	0	0	#mutated->#	P11474-Q9UBK2-EXP-3d24.pdb3-C-0-D-0.pdb	SA259H	A	B	|Low-Medium|	35.2943
P13747-P17693-EXP-3bze.pdb1-A-0-P-0.pdb	A	A	|Low-Medium|	0	0	0	0	0	0	0	0	0	|Low|	0	0	0	0	0	0	0	0	0	|High-Medium|	22.7205	1.08406	0.968483	0.0494977	-12.2005	0.137101	-12.3825	0.110564	400	|High|	17.6136	0	0.48148	0	-12.9	0	-12.9	0	1	#mutated->#	P13747-P17693-EXP-3bze.pdb1-A-0-P-0.pdb	VA76A	A	B	|Low-Medium|	0
P18465-P43629-EXP-3vh8.pdb1-A-0-G-0.pdb	B	A	|Low-Medium|	0	0	0	0	0	0	0	0	0	|Low|	0	0	0	0	0	0	0	0	0	|High-Medium|	22.5234	1.24231	0.955334	0.0529225	-12.2249	0.158356	-12.4025	0.124072	401	|High|	0	0	0	0	0	0	0	0	0	#mutated->#	P18465-P43629-EXP-3vh8.pdb1-A-0-G-0.pdb	SB279A	B	A	|Low-Medium|	0
P25054-Q07666-EXP-3qhe.pdb2-C-0-D-0.pdb	A	A	|Low-Medium|	30.4272	0.977378	0.789626	0.0734531	-11.3533	0.0899553	-11.6233	0.10063	30	|Low|	0	0	0	0	0	0	0	0	0	|High-Medium|	26.504	1.50283	0.927661	0.0853302	-11.762	0.164186	-12.0132	0.150003	371	|High|	0	0	0	0	0	0	0	0	0	#mutated->#	P25054-Q07666-EXP-3qhe.pdb2-C-0-D-0.pdb	KA516E	A	B	|Low-Medium|	29.7297
P26368-Q15637-EXP-4fxw.pdb2-C-0-D-0.pdb	B	A	|Low-Medium|	30.1471	0	0.770704	0	-11.4	0	-11.7	0	1	|Low|	0	0	0	0	0	0	0	0	0	|High-Medium|	22.0935	1.36351	0.929439	0.0666696	-12.2722	0.172778	-12.4373	0.130842	399	|High|	16.6667	0	0.669031	0	-13.1	0	-13	0	1	#mutated->#	P26368-Q15637-EXP-4fxw.pdb2-C-0-D-0.pdb	IB40R	B	A	|Low-Medium|	30.161
P30484-P43628-MDL-4n8v.pdb1-A-0-G-0.pdb	B	A	|Low-Medium|	35.9676	1.78974	0.853946	0.0971488	-10.8919	0.155387	-11.1024	0.172603	248	|Low|	38.9357	0.58851	0.749353	0.0324084	-10.6712	0.0495681	-10.8301	0.0698541	153	|High-Medium|	0	0	0	0	0	0	0	0	0	|High|	0	0	0	0	0	0	0	0	0	#mutated->#	P30484-P43628-MDL-4n8v.pdb1-A-0-G-0.pdb	QB339P	B	A	|Low-Medium|	36.5937
P30510-P43632-MDL-4n8v.pdb2-D-0-I-0.pdb	B	A	|Low-Medium|	33.7585	2.45332	0.889783	0.0868436	-11.0722	0.20559	-11.3093	0.237431	162	|Low|	40.211	1.65524	0.811687	0.0770827	-10.563	0.116101	-10.6903	0.168735	238	|High-Medium|	24.8366	0	1.01272	0	-11.9	0	-12.2	0	1	|High|	0	0	0	0	0	0	0	0	0	#mutated->#	P30510-P43632-MDL-4n8v.pdb2-D-0-I-0.pdb	KB311M	B	A	|Low-Medium|	35.0529
P30622-Q14203-EXP-2hqh.pdb5-F-2-B-2.pdb	B	A	|Low-Medium|	34.7368	0	0.978062	0	-11	0	-11.2	0	1	|Low|	48.8346	3.73023	0.916989	0.115958	-10.012	0.217426	-9.856	0.360748	400	|High-Medium|	0	0	0	0	0	0	0	0	0	|High|	0	0	0	0	0	0	0	0	0	#mutated->#	P30622-Q14203-EXP-2hqh.pdb5-F-2-B-2.pdb	RB90S	B	A	|Low-Medium|	36.4684
P49736-P62805-EXP-5bnx.pdb1-C-0-B-0.pdb	A	A	|Low-Medium|	0	0	0	0	0	0	0	0	0	|Low|	0	0	0	0	0	0	0	0	0	|High-Medium|	22.273	2.1183	0.90621	0.103502	-12.2668	0.271058	-12.4207	0.20987	401	|High|	0	0	0	0	0	0	0	0	0	#mutated->#	P49736-P62805-EXP-5bnx.pdb1-C-0-B-0.pdb	LA72A	A	B	|Low-Medium|	0
P49768-Q9NZ42-EXP-6iyc.pdb1-B-0-D-0.pdb	B	A	|Low-Medium|	0	0	0	0	0	0	0	0	0	|Low|	0	0	0	0	0	0	0	0	0	|High-Medium|	22.2023	1.96922	0.910191	0.110154	-12.2744	0.253929	-12.4279	0.191379	398	|High|	16.5942	1.38062	0.662439	0.238406	-13.1333	0.23094	-12.9667	0.11547	3	#mutated->#	P49768-Q9NZ42-EXP-6iyc.pdb1-B-0-D-0.pdb	FB94A	B	A	|Low-Medium|	30.1812
P49917-Q96SD1-EXP-4htp.pdb1-A-0-C-0.pdb	B	A	|Low-Medium|	88.7135	1.8879	0.0014	0	-8.29462	0.0980334	-5.9843	0.198134	223	|Low|	77.3429	4.986	0.0223905	0.0381624	-8.68092	0.189047	-7.10058	0.482664	173	|High-Medium|	0	0	0	0	0	0	0	0	0	|High|	0	0	0	0	0	0	0	0	0	#mutated->#	P49917-Q96SD1-EXP-4htp.pdb1-A-0-C-0.pdb	FB492A	B	A	|Low-Medium|	90.1777
P55072-Q9UKV5-EXP-3tiw.pdb2-B-0-D-0.pdb	A	A	|Low-Medium|	33.9599	1.95768	0.926931	0.0776365	-11.0516	0.163448	-11.2948	0.194745	343	|Low|	39.6651	1.4958	0.785155	0.0749016	-10.59	0.111117	-10.744	0.151402	50	|High-Medium|	28.7002	0.526218	0.771788	0.0536793	-11.525	0.046291	-11.8125	0.0353553	8	|High|	0	0	0	0	0	0	0	0	0	#mutated->#	P55072-Q9UKV5-EXP-3tiw.pdb2-B-0-D-0.pdb	DA35A	A	B	|Low-Medium|	31.6403
P61328-Q14524-EXP-4jq0.pdb1-A-0-D-0.pdb	B	A	|Low-Medium|	37.1418	0.979679	0.783138	0.0900518	-10.7937	0.0997914	-10.9938	0.0997914	16	|Low|	41.355	2.18529	0.857891	0.0834418	-10.5	0.151038	-10.5753	0.203968	385	|High-Medium|	0	0	0	0	0	0	0	0	0	|High|	0	0	0	0	0	0	0	0	0	#mutated->#	P61328-Q14524-EXP-4jq0.pdb1-A-0-D-0.pdb	EB1890K	B	A	|Low-Medium|	37.3837
P62491-Q9UBF8-EXP-5c46.pdb1-F-0-E-0.pdb	B	A	|Low-Medium|	36.2425	1.43598	0.851663	0.0920475	-10.8724	0.130648	-11.0828	0.15369	29	|Low|	44.779	3.24939	0.936878	0.0757889	-10.2505	0.212607	-10.2478	0.317624	372	|High-Medium|	0	0	0	0	0	0	0	0	0	|High|	0	0	0	0	0	0	0	0	0	#mutated->#	P62491-Q9UBF8-EXP-5c46.pdb1-F-0-E-0.pdb	GB155D	B	A	|Low-Medium|	36.2615
P63208-Q13309-EXP-1fs1.pdb1-D-0-C-0.pdb	B	A	|Low-Medium|	36.0185	1.72463	0.853907	0.0940448	-10.8859	0.142996	-11.1038	0.165492	78	|Low|	42.3671	3.09893	0.878801	0.0926096	-10.4155	0.207039	-10.4777	0.308369	323	|High-Medium|	0	0	0	0	0	0	0	0	0	|High|	0	0	0	0	0	0	0	0	0	#mutated->#	P63208-Q13309-EXP-1fs1.pdb1-D-0-C-0.pdb	PB113A	B	A	|Low-Medium|	35.2105
P78560-Q9HB75-EXP-2of5.pdb1-B-0-H-0.pdb	A	A	|Low-Medium|	36.6215	0.782284	0.839088	0.0718268	-10.8409	0.0666125	-11.0318	0.0893701	22	|Low|	44.9861	3.85303	0.920407	0.0806608	-10.2496	0.240961	-10.2266	0.374593	379	|High-Medium|	0	0	0	0	0	0	0	0	0	|High|	0	0	0	0	0	0	0	0	0	#mutated->#	P78560-Q9HB75-EXP-2of5.pdb1-B-0-H-0.pdb	RA170C	A	B	|Low-Medium|	36.0746
Q13426-Q9H9Q4-EXP-3rwr.pdb1-F-0-I-0.pdb	A	A	|Low-Medium|	0	0	0	0	0	0	0	0	0	|Low|	45.267	0.666133	0.988594	0.00779011	-10.2347	0.0531079	-10.193	0.0620574	401	|High-Medium|	0	0	0	0	0	0	0	0	0	|High|	0	0	0	0	0	0	0	0	0	#mutated->#	Q13426-Q9H9Q4-EXP-3rwr.pdb1-F-0-I-0.pdb	FA106Y	A	B	|Low-Medium|	0
Q13546-Q9Y572-EXP-5v7z.pdb1-B-0-G-0.pdb	B	A	|Low-Medium|	0	0	0	0	0	0	0	0	0	|Low|	57.8279	6.7395	0.537105	0.293895	-9.54188	0.341428	-8.99747	0.662035	277	|High-Medium|	0	0	0	0	0	0	0	0	0	|High|	0	0	0	0	0	0	0	0	0	#mutated->#	Q13546-Q9Y572-EXP-5v7z.pdb1-B-0-G-0.pdb	GB461P	B	A	|Low-Medium|	0
Q495A1-Q92692-EXP-5v52.pdb2-B-0-C-0.pdb	A	A	|Low-Medium|	36.3782	1.25325	0.846984	0.0896124	-10.8602	0.0934133	-11.0538	0.132336	93	|Low|	42.2729	2.91169	0.880421	0.0939004	-10.4299	0.194092	-10.4873	0.282731	308	|High-Medium|	0	0	0	0	0	0	0	0	0	|High|	0	0	0	0	0	0	0	0	0	#mutated->#	Q495A1-Q92692-EXP-5v52.pdb2-B-0-C-0.pdb	TA112A	A	B	|Low-Medium|	36.0529
Q92542-Q9NZ42-EXP-6iyc.pdb1-A-0-D-0.pdb	B	A	|Low-Medium|	31.7308	1.9231	0.872688	0.0731902	-11.225	0.15	-11.5	0.2	4	|Low|	57.2135	2.55094	0.558099	0.113866	-9.54351	0.126833	-9.02748	0.251238	393	|High-Medium|	25.3928	2.8202	0.926458	0.138566	-11.875	0.287228	-12.15	0.251661	4	|High|	0	0	0	0	0	0	0	0	0	#mutated->#	Q92542-Q9NZ42-EXP-6iyc.pdb1-A-0-D-0.pdb	DB90A	B	A	|Low-Medium|	36.2085
Q96T58-Q9Y618-EXP-2rt5.pdb1-A-0-B-0.pdb	A	A	|Low-Medium|	37.1167	1.1258	0.785563	0.106709	-10.775	0.0957427	-10.975	0.0957427	4	|Low|	45.7461	2.85234	0.957237	0.0477013	-10.2005	0.179926	-10.1524	0.277754	397	|High-Medium|	0	0	0	0	0	0	0	0	0	|High|	0	0	0	0	0	0	0	0	0	#mutated->#	Q96T58-Q9Y618-EXP-2rt5.pdb1-A-0-B-0.pdb	RA3554A	A	B	|Low-Medium|	36.6589
Q9BUL8-Q9P289-EXP-4geh.pdb2-C-0-D-0.pdb	A	A	|Low-Medium|	0	0	0	0	0	0	0	0	0	|Low|	0	0	0	0	0	0	0	0	0	|High-Medium|	23.0374	1.38689	0.970708	0.0665522	-12.1603	0.176774	-12.3494	0.135299	401	|High|	0	0	0	0	0	0	0	0	0	#mutated->#	Q9BUL8-Q9P289-EXP-4geh.pdb2-C-0-D-0.pdb	LA44D	A	B	|Low-Medium|	0
Q9HD34-Q9Y697-EXP-5wgb.pdb1-B-0-A-0.pdb	A	A	|Low-Medium|	35.3639	1.90221	0.888401	0.0988758	-10.9394	0.153987	-11.1697	0.19443	33	|Low|	44.6865	3.43619	0.929183	0.0749616	-10.2672	0.22248	-10.2489	0.333494	366	|High-Medium|	28.8312	0.367342	0.75937	0.0414534	-11.5	0	-11.8	0	2	|High|	0	0	0	0	0	0	0	0	0	#mutated->#	Q9HD34-Q9Y697-EXP-5wgb.pdb1-B-0-A-0.pdb	RA68L	A	B	|Low-Medium|	34.9714
Q9NQS7-Q9UQB9-MDL-4c2w.pdb1-D-0-A-0.pdb	B	A	|Low-Medium|	0	0	0	0	0	0	0	0	0	|Low|	0	0	0	0	0	0	0	0	0	|High-Medium|	19.4188	0.79019	0.704999	0.0945672	-12.6509	0.120565	-12.6977	0.0835134	395	|High|	17.2833	0.400703	0.546453	0.0793102	-12.9833	0.0752773	-12.9167	0.0408248	6	#mutated->#	Q9NQS7-Q9UQB9-MDL-4c2w.pdb1-D-0-A-0.pdb	KB89R	B	A	|Low-Medium|	0
[truncated: 38 more columns]

## Sheet: 0573
x	x	x	x	x	x	x	x	x	x	x	x	x	x	x	x	x	x	x	x	x	x	x	x	x	x	x	x	x	x	x	x	x	x	x	x	x	x	x	x	x	x	x	x	x	x	x	x	x	x
O43187-Q9NWZ3-EXP-3mop.pdb1-N-0-J-0.pdb	A	A	|Low-Medium|	91.5756	12.3758	0.0339564	0.166006	-8.26923	0.540199	-5.71923	1.18288	26	|Low|	61.4873	9.42042	0.410999	0.328051	-9.38016	0.443632	-8.62735	0.911812	373	|High-Medium|	0	0	0	0	0	0	0	0	0	|High|	0	0	0	0	0	0	0	0	0	#mutated->#	O43187-Q9NWZ3-EXP-3mop.pdb1-N-0-J-0.pdb	MA66D	A	B	|Low-Medium|	70.9805
O43918-P68431-MDL-5t8r.pdb5-A-0-G-0.pdb	A	A	|Low-Medium|	36.4591	1.27774	0.851505	0.117209	-10.85	0.0707107	-11.05	0.0707107	2	|Low|	53.6918	6.92653	0.69088	0.289645	-9.75514	0.372169	-9.3807	0.671497	399	|High-Medium|	0	0	0	0	0	0	0	0	0	|High|	0	0	0	0	0	0	0	0	0	#mutated->#	O43918-P68431-MDL-5t8r.pdb5-A-0-G-0.pdb	CA17Y	A	B	|Low-Medium|	0
O43924-Q92834-EXP-4jhp.pdb1-B-0-C-0.pdb	B	A	|Low-Medium|	30.1989	0.480298	0.775297	0.0534855	-11.4	0	-11.6333	0.057735	3	|Low|	0	0	0	0	0	0	0	0	0	|High-Medium|	24.0728	1.46943	0.987937	0.0493049	-12.0379	0.181632	-12.2495	0.145416	398	|High|	0	0	0	0	0	0	0	0	0	#mutated->#	O43924-Q92834-EXP-4jhp.pdb1-B-0-C-0.pdb	EB216R	B	A	|Low-Medium|	30.3758
O60341-O95863-EXP-2y48.pdb1-A-0-C-0.pdb	B	A	|Low-Medium|	0	0	0	0	0	0	0	0	0	|Low|	76.0054	1.47679	0.0149225	0.00582385	-8.76384	0.0530492	-7.22943	0.114595	401	|High-Medium|	0	0	0	0	0	0	0	0	0	|High|	0	0	0	0	0	0	0	0	0	#mutated->#	O60341-O95863-EXP-2y48.pdb1-A-0-C-0.pdb	RB2A	B	A	|Low-Medium|	0
O75164-Q16695-EXP-4v2w.pdb1-A-0-C-0.pdb	A	A	|Low-Medium|	0	0	0	0	0	0	0	0	0	|Low|	39	0	0.753602	0	-10.7	0	-10.8	0	401	|High-Medium|	0	0	0	0	0	0	0	0	0	|High|	0	0	0	0	0	0	0	0	0	#mutated->#	O75164-Q16695-EXP-4v2w.pdb1-A-0-C-0.pdb	NA290I	A	B	|Low-Medium|	35.0877
O75340-O94979-EXP-3wxa.pdb1-A-0-C-0.pdb	A	A	|Low-Medium|	36.9185	0.876955	0.807684	0.0786661	-10.8314	0.0676123	-10.9886	0.105081	35	|Low|	43.3569	3.43603	0.900612	0.0899247	-10.3514	0.222405	-10.3776	0.332596	366	|High-Medium|	0	0	0	0	0	0	0	0	0	|High|	0	0	0	0	0	0	0	0	0	#mutated->#	O75340-O94979-EXP-3wxa.pdb1-A-0-C-0.pdb	FA60A	A	B	|Low-Medium|	36.8751
O75340-Q8WUM4-EXP-2zne.pdb1-A-0-C-0.pdb	A	A	|Low-Medium|	32.2385	2.27203	0.865758	0.0929202	-11.1982	0.198915	-11.4622	0.219112	164	|Low|	39.8565	1.58584	0.794495	0.0749493	-10.5846	0.106819	-10.7462	0.16641	13	|High-Medium|	27.4258	1.37395	0.871073	0.0988619	-11.6674	0.143813	-11.9201	0.132915	224	|High|	0	0	0	0	0	0	0	0	0	#mutated->#	O75340-Q8WUM4-EXP-2zne.pdb1-A-0-C-0.pdb	YA91A	A	B	|Low-Medium|	32.6007
O75381-P40855-EXP-2w85.pdb1-A-0-B-0.pdb	B	A	|Low-Medium|	89.0017	2.59035	0.0014	0	-8.29895	0.0950865	-5.96632	0.236828	95	|Low|	76.3937	6.928	0.0485395	0.105254	-8.73497	0.272185	-7.18824	0.6743	306	|High-Medium|	0	0	0	0	0	0	0	0	0	|High|	0	0	0	0	0	0	0	0	0	#mutated->#	O75381-P40855-EXP-2w85.pdb1-A-0-B-0.pdb	EB103A	B	A	|Low-Medium|	100
O75436-Q96QK1-EXP-5f0j.pdb1-B-0-A-0.pdb	A	A	|Low-Medium|	36.7296	1.1026	0.821179	0.0945436	-10.8304	0.097397	-11.0174	0.115413	23	|Low|	40.6144	1.47381	0.832834	0.0621653	-10.5325	0.103131	-10.6582	0.142166	378	|High-Medium|	0	0	0	0	0	0	0	0	0	|High|	0	0	0	0	0	0	0	0	0	#mutated->#	O75436-Q96QK1-EXP-5f0j.pdb1-B-0-A-0.pdb	IA235D	A	B	|Low-Medium|	36.9798
O75581-Q9BQB4-EXP-3sov.pdb1-A-0-Z-0.pdb	A	A	|Low-Medium|	33.8197	1.18101	0.970673	0.0345179	-11.0636	0.104743	-11.3075	0.120183	401	|Low|	0	0	0	0	0	0	0	0	0	|High-Medium|	0	0	0	0	0	0	0	0	0	|High|	0	0	0	0	0	0	0	0	0	#mutated->#	O75581-Q9BQB4-EXP-3sov.pdb1-A-0-Z-0.pdb	RA141M	A	B	|Low-Medium|	33.1018
O76064-Q14676-MDD-FHA-FHA-1lgq-A-38-106-B-38-106.pdb	A	A	|Low-Medium|	0	0	0	0	0	0	0	0	0	|Low|	0	0	0	0	0	0	0	0	0	|High-Medium|	23.4838	0.944129	0.995726	0.0259461	-12.1052	0.117036	-12.3067	0.0963304	401	|High|	0	0	0	0	0	0	0	0	0	#mutated->#	O76064-Q14676-MDD-FHA-FHA-1lgq-A-38-106-B-38-106.pdb	RA5A	A	B	|Low-Medium|	0
O94829-P63279-EXP-2xwu.pdb1-B-0-A-0.pdb	A	A	|Low-Medium|	0	0	0	0	0	0	0	0	0	|Low|	0	0	0	0	0	0	0	0	0	|High-Medium|	18.1904	0.476856	0.541246	0.0678827	-12.8385	0.0869718	-12.8077	0.0493548	13	|High|	16.3143	0.57779	0.731723	0.105193	-13.1446	0.105147	-12.9961	0.0606639	388	#mutated->#	O94829-P63279-EXP-2xwu.pdb1-B-0-A-0.pdb	YA34R	A	B	|Low-Medium|	0
P01903-P13760-EXP-5ni9.pdb1-A-0-B-0.pdb	A	A	|Low-Medium|	0	0	0	0	0	0	0	0	0	|Low|	0	0	0	0	0	0	0	0	0	|High-Medium|	0	0	0	0	0	0	0	0	0	|High|	14.6529	0.584114	0.950485	0.0388068	-13.4536	0.119971	-13.1599	0.0641013	401	#mutated->#	P01903-P13760-EXP-5ni9.pdb1-A-0-B-0.pdb	GA28H	A	B	|Low-Medium|	0
P01903-P28067-EXP-4fqx.pdb1-A-0-C-0.pdb	A	A	|Low-Medium|	29.6296	0	0.711824	0	-11.4	0	-11.7	0	1	|Low|	0	0	0	0	0	0	0	0	0	|High-Medium|	26.1709	0.850325	0.963827	0.0416337	-11.7952	0.101874	-12.0497	0.0878592	400	|High|	0	0	0	0	0	0	0	0	0	#mutated->#	P01903-P28067-EXP-4fqx.pdb1-A-0-C-0.pdb	SA53H	A	B	|Low-Medium|	30.4843
P04637-Q07817-EXP-2mej.pdb1-B-0-A-0.pdb	A	A	|Low-Medium|	34.8835	2.00685	0.902012	0.0894118	-10.9781	0.170319	-11.2021	0.197425	374	|Low|	38.327	0.347008	0.714762	0.0199439	-10.692	0.0276887	-10.884	0.0374166	25	|High-Medium|	28.0016	0.179534	0.845182	0.0166019	-11.6	0	-11.9	0	2	|High|	0	0	0	0	0	0	0	0	0	#mutated->#	P04637-Q07817-EXP-2mej.pdb1-B-0-A-0.pdb	RA248T	A	B	|Low-Medium|	35.5359
P04637-Q09472-EXP-pdb2k8f.ent-B-0-A-0.pdb	A	A	|Low-Medium|	33.5248	1.77865	0.938193	0.0656169	-11.0842	0.152329	-11.3391	0.171163	386	|Low|	39.7706	1.38641	0.792014	0.0714087	-10.5909	0.094388	-10.7455	0.129334	11	|High-Medium|	28.1884	1.23541	0.813514	0.108421	-11.6	0.141421	-11.825	0.125831	4	|High|	0	0	0	0	0	0	0	0	0	#mutated->#	P04637-Q09472-EXP-pdb2k8f.ent-B-0-A-0.pdb	LA22A	A	B	|Low-Medium|	34.3843
P05113-Q01344-EXP-3qt2.pdb1-C-0-A-0.pdb	A	A	|Low-Medium|	34.3825	1.509	0.947365	0.0554768	-11.0118	0.121445	-11.2628	0.150945	363	|Low|	0	0	0	0	0	0	0	0	0	|High-Medium|	25.7801	1.76037	0.951156	0.0725429	-11.8395	0.216282	-12.0816	0.178364	38	|High|	0	0	0	0	0	0	0	0	0	#mutated->#	P05113-Q01344-EXP-3qt2.pdb1-C-0-A-0.pdb	RA91A	A	B	|Low-Medium|	32.5029
P08151-Q9UMX1-EXP-4kmd.pdb2-B-1-A-1.pdb	B	A	|Low-Medium|	30.7945	1.10161	0.822856	0.084008	-11.3268	0.10248	-11.5971	0.109326	205	|Low|	0	0	0	0	0	0	0	0	0	|High-Medium|	28.0788	1.00916	0.825617	0.0860973	-11.5969	0.106655	-11.8541	0.104433	196	|High|	0	0	0	0	0	0	0	0	0	#mutated->#	P08151-Q9UMX1-EXP-4kmd.pdb2-B-1-A-1.pdb	DB159R	B	A	|Low-Medium|	30.6162
P08581-P22681-EXP-3bux.pdb6-C-0-D-0.pdb	B	A	|Low-Medium|	33.5784	1.97051	0.926089	0.0748792	-11.0876	0.168865	-11.3329	0.193086	362	|Low|	39.688	2.58689	0.769926	0.0768377	-10.6071	0.176233	-10.7286	0.249232	28	|High-Medium|	28.6498	0.652689	0.775514	0.0691251	-11.5364	0.0504525	-11.8	0.0774597	11	|High|	0	0	0	0	0	0	0	0	0	#mutated->#	P08581-P22681-EXP-3bux.pdb6-C-0-D-0.pdb	RB294A	B	A	|Low-Medium|	34.372
P10398-Q02750-MDL-4mne.pdb1-B-0-A-0.pdb	B	A	|Low-Medium|	29.8791	0.344382	0.740132	0.0390681	-11.4	0	-11.7	0	3	|Low|	0	0	0	0	0	0	0	0	0	|High-Medium|	22.6063	1.97636	0.929402	0.0984521	-12.2195	0.253102	-12.3932	0.19165	395	|High|	16.8686	0.751355	0.62691	0.146045	-13.0333	0.152753	-12.9333	0.057735	3	#mutated->#	P10398-Q02750-MDL-4mne.pdb1-B-0-A-0.pdb	IB521A	B	A	|Low-Medium|	30.2262
P11717-Q9NZ52-EXP-1lf8.pdb4-H-0-D-0.pdb	A	A	|Low-Medium|	0	0	0	0	0	0	0	0	0	|Low|	66.8218	7.18733	0.208745	0.269562	-9.11212	0.339552	-8.13232	0.688065	396	|High-Medium|	0	0	0	0	0	0	0	0	0	|High|	0	0	0	0	0	0	0	0	0	#mutated->#	P11717-Q9NZ52-EXP-1lf8.pdb4-H-0-D-0.pdb	LA309A	A	B	|Low-Medium|	0
P11940-Q9BPZ3-EXP-3kus.pdb2-B-0-D-0.pdb	A	A	|Low-Medium|	36.0577	1.47239	0.864202	0.0889267	-10.883	0.12392	-11.0915	0.141159	47	|Low|	42.8339	2.67596	0.904855	0.0843003	-10.3845	0.178795	-10.428	0.256988	354	|High-Medium|	0	0	0	0	0	0	0	0	0	|High|	0	0	0	0	0	0	0	0	0	#mutated->#	P11940-Q9BPZ3-EXP-3kus.pdb2-B-0-D-0.pdb	KA580A	A	B	|Low-Medium|	35.9057
P14598-P19878-EXP-pdb1k4u.ent-P-0-S-0.pdb	A	A	|Low-Medium|	0	0	0	0	0	0	0	0	0	|Low|	42.6623	1.61419	0.917	0.0533865	-10.3923	0.111871	-10.4561	0.162231	401	|High-Medium|	0	0	0	0	0	0	0	0	0	|High|	0	0	0	0	0	0	0	0	0	#mutated->#	P14598-P19878-EXP-pdb1k4u.ent-P-0-S-0.pdb	PA366A	A	B	|Low-Medium|	36.8777
P19793-Q15788-EXP-5ji0.pdb1-A-0-F-0.pdb	B	A	|Low-Medium|	95.3311	3.22573	0.0014	0	-8.12159	0.0883898	-5.37587	0.301676	315	|Low|	83.6433	3.29802	0.00358431	0.00617918	-8.47736	0.117082	-6.48302	0.306805	53	|High-Medium|	0	0	0	0	0	0	0	0	0	|High|	0	0	0	0	0	0	0	0	0	#mutated->#	P19793-Q15788-EXP-5ji0.pdb1-A-0-F-0.pdb	LB693A	B	A	|Low-Medium|	94.3014
P20340-Q01968-MDL-3qbt.pdb3-E-0-F-0.pdb	B	A	|Low-Medium|	31.4239	1.35392	0.868569	0.0882251	-11.2696	0.122985	-11.5355	0.136055	138	|Low|	0	0	0	0	0	0	0	0	0	|High-Medium|	26.9099	1.94788	0.884043	0.0954181	-11.7255	0.215074	-11.9719	0.191536	263	|High|	0	0	0	0	0	0	0	0	0	#mutated->#	P20340-Q01968-MDL-3qbt.pdb3-E-0-F-0.pdb	FB287V	B	A	|Low-Medium|	31.3353
P22681-Q9C004-EXP-3bun.pdb3-B-0-A-0.pdb	A	A	|Low-Medium|	34.6598	1.95246	0.913289	0.0816159	-10.9987	0.163361	-11.2252	0.193469	306	|Low|	42.1001	4.57448	0.832766	0.133573	-10.444	0.279765	-10.5033	0.444335	91	|High-Medium|	28.9732	0.310713	0.743036	0.0360834	-11.5	0	-11.75	0.057735	4	|High|	0	0	0	0	0	0	0	0	0	#mutated->#	P22681-Q9C004-EXP-3bun.pdb3-B-0-A-0.pdb	TA298A	A	B	|Low-Medium|	34.35
P23297-P25815-MDL-5k89.pdb2-H-0-H-1.pdb	A	A	|Low-Medium|	30.2552	0.668839	0.778374	0.0660189	-11.3744	0.053865	-11.6512	0.0735886	43	|Low|	0	0	0	0	0	0	0	0	0	|High-Medium|	27.0234	1.48508	0.896423	0.0962683	-11.7089	0.162538	-11.9601	0.147612	358	|High|	0	0	0	0	0	0	0	0	0	#mutated->#	P23297-P25815-MDL-5k89.pdb2-H-0-H-1.pdb	FA72L	A	B	|Low-Medium|	30.162
P26368-Q96I25-MDD-RRM_1-RRM_1-2ghp-F-122-189-E-212-283.pdb	B	A	|Low-Medium|	86.6667	0	0.0014	0	-8.4	0	-6.2	0	7	|Low|	74.3955	8.70774	0.087931	0.203183	-8.82406	0.388889	-7.36316	0.859481	133	|High-Medium|	0	0	0	0	0	0	0	0	0	|High|	0	0	0	0	0	0	0	0	0	#mutated->#	P26368-Q96I25-MDD-RRM_1-RRM_1-2ghp-F-122-189-E-212-283.pdb	RB115D	B	A	|Low-Medium|	86.6667
P29083-P32780-EXP-pdb2rnr.ent-A-0-B-0.pdb	B	A	|Low-Medium|	35.2652	1.14716	0.93006	0.0605482	-10.9449	0.0966153	-11.1661	0.116192	392	|Low|	38.6697	0.334331	0.734629	0.0190015	-10.6889	0.0333333	-10.8444	0.0527046	9	|High-Medium|	0	0	0	0	0	0	0	0	0	|High|	0	0	0	0	0	0	0	0	0	#mutated->#	P29083-P32780-EXP-pdb2rnr.ent-A-0-B-0.pdb	KB54A	B	A	|Low-Medium|	30.3393
P38398-Q6UWZ7-EXP-4y2g.pdb1-A-0-B-0.pdb	A	A	|Low-Medium|	0	0	0	0	0	0	0	0	0	|Low|	47.7872	4.54557	0.900535	0.105743	-10.08	0.270649	-9.95611	0.436771	401	|High-Medium|	0	0	0	0	0	0	0	0	0	|High|	0	0	0	0	0	0	0	0	0	#mutated->#	P38398-Q6UWZ7-EXP-4y2g.pdb1-A-0-B-0.pdb	MA1775R	A	B	|Low-Medium|	35.8582
P38919-Q9Y5S9-EXP-2j0s.pdb1-A-0-D-0.pdb	A	A	|Low-Medium|	32.999	1.98341	0.920208	0.0651895	-11.125	0.154479	-11.4	0.195402	12	|Low|	47.4414	9.53024	0.754396	0.29596	-10.1238	0.533765	-9.99048	0.933223	21	|High-Medium|	23.7385	3.93736	0.826466	0.121859	-12.1053	0.515831	-12.2632	0.360879	19	|High|	13.9285	0.492914	0.978469	0.0105919	-13.575	0.10351	-13.2375	0.0517549	8	#mutated->#	P38919-Q9Y5S9-EXP-2j0s.pdb1-A-0-D-0.pdb	HA223D	A	B	|Low-Medium|	31.0714
P40337-Q13617-EXP-4wqo.pdb1-A-0-D-0.pdb	A	A	|Low-Medium|	88.9318	4.20769	0.0014	0	-8.31351	0.137764	-5.97297	0.412747	37	|Low|	66.7426	9.42512	0.260217	0.264037	-9.13935	0.401506	-8.12426	0.913176	338	|High-Medium|	0	0	0	0	0	0	0	0	0	|High|	0	0	0	0	0	0	0	0	0	#mutated->#	P40337-Q13617-EXP-4wqo.pdb1-A-0-D-0.pdb	CA162F	A	B	|Low-Medium|	0
P42566-Q8WXE9-EXP-2jxc.pdb1-A-0-B-0.pdb	A	A	|Low-Medium|	37.4584	0.585439	0.755366	0.062589	-10.75	0.0662868	-10.9471	0.0662195	34	|Low|	41.0996	1.9066	0.851637	0.0847814	-10.5044	0.136035	-10.6052	0.184954	367	|High-Medium|	0	0	0	0	0	0	0	0	0	|High|	0	0	0	0	0	0	0	0	0	#mutated->#	P42566-Q8WXE9-EXP-2jxc.pdb1-A-0-B-0.pdb	WA169A	A	B	|Low-Medium|	36.6063
P51587-Q06609-EXP-1n0w.pdb1-B-0-A-0.pdb	B	A	|Low-Medium|	30.0601	0.525491	0.758814	0.0552563	-11.386	0.0406239	-11.672	0.0539033	93	|Low|	0	0	0	0	0	0	0	0	0	|High-Medium|	28.2464	0.931169	0.811292	0.078008	-11.5792	0.0973093	-11.8422	0.0956939	308	|High|	0	0	0	0	0	0	0	0	0	#mutated->#	P51587-Q06609-EXP-1n0w.pdb1-B-0-A-0.pdb	SB208L	B	A	|Low-Medium|	30.1115
P51587-Q86YC2-EXP-3eu7.pdb3-X-0-A-0.pdb	A	A	|Low-Medium|	0	0	0	0	0	0	0	0	0	|Low|	66.6667	0	0.131646	0	-9.1	0	-8.1	0	401	|High-Medium|	0	0	0	0	0	0	0	0	0	|High|	0	0	0	0	0	0	0	0	0	#mutated->#	P51587-Q86YC2-EXP-3eu7.pdb3-X-0-A-0.pdb	WA31C	A	B	|Low-Medium|	86.6667
P54198-Q9Y294-EXP-2i32.pdb1-E-0-A-0.pdb	A	A	|Low-Medium|	0	0	0	0	0	0	0	0	0	|Low|	51.0566	2.85836	0.871103	0.103159	-9.88803	0.161575	-9.6419	0.279447	401	|High-Medium|	0	0	0	0	0	0	0	0	0	|High|	0	0	0	0	0	0	0	0	0	#mutated->#	P54198-Q9Y294-EXP-2i32.pdb1-E-0-A-0.pdb	LA464D	A	B	|Low-Medium|	36.6013
P55957-Q07817-EXP-4qve.pdb1-B-0-A-0.pdb	A	A	|Low-Medium|	0	0	0	0	0	0	0	0	0	|Low|	49.0275	3.52763	0.913425	0.0865009	-10.0025	0.205411	-9.83516	0.343927	401	|High-Medium|	0	0	0	0	0	0	0	0	0	|High|	0	0	0	0	0	0	0	0	0	#mutated->#	P55957-Q07817-EXP-4qve.pdb1-B-0-A-0.pdb	GA94A	A	B	|Low-Medium|	0
P56945-Q8N5H7-EXP-3t6g.pdb1-B-0-A-0.pdb	B	A	|Low-Medium|	30.6431	0.930732	0.813567	0.0831849	-11.3411	0.0838169	-11.6112	0.0957098	197	|Low|	0	0	0	0	0	0	0	0	0	|High-Medium|	28.1317	1.09601	0.818296	0.0852477	-11.5868	0.116057	-11.8578	0.113551	204	|High|	0	0	0	0	0	0	0	0	0	#mutated->#	P56945-Q8N5H7-EXP-3t6g.pdb1-B-0-A-0.pdb	LB466E	B	A	|Low-Medium|	30.4391
P60953-Q9UQB8-EXP-4js0.pdb1-A-0-B-0.pdb	B	A	|Low-Medium|	30.2042	0.895072	0.768865	0.0799203	-11.3857	0.0803432	-11.65	0.0793492	28	|Low|	0	0	0	0	0	0	0	0	0	|High-Medium|	26.9507	1.13332	0.912805	0.0752312	-11.7029	0.127072	-11.9708	0.102541	373	|High|	0	0	0	0	0	0	0	0	0	#mutated->#	P60953-Q9UQB8-EXP-4js0.pdb1-A-0-B-0.pdb	PB270A	B	A	|Low-Medium|	30.4412
P61956-P63279-EXP-5d2m.pdb1-E-0-A-0.pdb	B	A	|Low-Medium|	33.8	2.39097	0.897622	0.0821516	-11.0615	0.215549	-11.3231	0.228574	26	|Low|	44.9938	3.62843	0.928802	0.0838639	-10.2542	0.228047	-10.2083	0.348593	373	|High-Medium|	27.2711	0.137532	0.906188	0.010222	-11.7	0	-11.9	0	2	|High|	0	0	0	0	0	0	0	0	0	#mutated->#	P61956-P63279-EXP-5d2m.pdb1-E-0-A-0.pdb	RB17E	B	A	|Low-Medium|	35.1579
P61964-Q7Z3B3-EXP-4cy1.pdb1-A-0-D-0.pdb	B	A	|Low-Medium|	0	0	0	0	0	0	0	0	0	|Low|	65.5326	7.35938	0.251344	0.261943	-9.16783	0.337694	-8.2384	0.710578	401	|High-Medium|	0	0	0	0	0	0	0	0	0	|High|	0	0	0	0	0	0	0	0	0	#mutated->#	P61964-Q7Z3B3-EXP-4cy1.pdb1-A-0-D-0.pdb	RB592A	B	A	|Low-Medium|	87.6984
P62820-Q01968-MDL-3qbt.pdb4-G-0-H-0.pdb	B	A	|Low-Medium|	31.8383	1.70884	0.880664	0.0924024	-11.2301	0.151759	-11.4903	0.160599	176	|Low|	0	0	0	0	0	0	0	0	0	|High-Medium|	27.4391	1.19845	0.875618	0.0829716	-11.6724	0.127285	-11.9027	0.11761	225	|High|	0	0	0	0	0	0	0	0	0	#mutated->#	P62820-Q01968-MDL-3qbt.pdb4-G-0-H-0.pdb	GB292D	B	A	|Low-Medium|	32.801
P63165-Q9UBT2-EXP-3kyc.pdb1-D-0-B-0.pdb	B	A	|Low-Medium|	0	0	0	0	0	0	0	0	0	|Low|	0	0	0	0	0	0	0	0	0	|High-Medium|	0	0	0	0	0	0	0	0	0	|High|	15.3664	0.358902	0.889175	0.0511168	-13.3172	0.0719596	-13.091	0.0370027	401	#mutated->#	P63165-Q9UBT2-EXP-3kyc.pdb1-D-0-B-0.pdb	DB117A	B	A	|Low-Medium|	0
P78314-Q9H2K2-EXP-3twr.pdb2-F-0-B-0.pdb	B	A	|Low-Medium|	35.0538	0	0.963964	0	-11	0	-11.2	0	401	|Low|	0	0	0	0	0	0	0	0	0	|High-Medium|	0	0	0	0	0	0	0	0	0	|High|	0	0	0	0	0	0	0	0	0	#mutated->#	P78314-Q9H2K2-EXP-3twr.pdb2-F-0-B-0.pdb	YB569A	B	A	|Low-Medium|	34.5289
Q07812-Q07817-EXP-3pl7.pdb1-C-0-A-0.pdb	A	A	|Low-Medium|	37.3626	0	0.768625	0	-10.8	0	-11	0	1	|Low|	49.7004	4.56048	0.867743	0.135109	-9.96725	0.26689	-9.76725	0.436668	400	|High-Medium|	0	0	0	0	0	0	0	0	0	|High|	0	0	0	0	0	0	0	0	0	#mutated->#	Q07812-Q07817-EXP-3pl7.pdb1-C-0-A-0.pdb	DA68R	A	B	|Low-Medium|	37.1429
Q07812-Q92843-MDL-3fdl.pdb2-A-1-A-0.pdb	A	A	|Low-Medium|	0	0	0	0	0	0	0	0	0	|Low|	0	0	0	0	0	0	0	0	0	|High-Medium|	21.8215	1.29288	0.915568	0.079552	-12.3175	0.169984	-12.4658	0.126114	401	|High|	0	0	0	0	0	0	0	0	0	#mutated->#	Q07812-Q92843-MDL-3fdl.pdb2-A-1-A-0.pdb	DA33R	A	B	|Low-Medium|	0
Q12834-Q13257-EXP-5lcw.pdb1-Q-0-Z-0.pdb	B	A	|Low-Medium|	0	0	0	0	0	0	0	0	0	|Low|	0	0	0	0	0	0	0	0	0	|High-Medium|	18.0125	0.174721	0.515959	0.0269545	-12.8812	0.0391151	-12.8239	0.0427146	293	|High|	16.7808	0.473724	0.645279	0.0923024	-13.0778	0.0878969	-12.9537	0.0500951	108	#mutated->#	Q12834-Q13257-EXP-5lcw.pdb1-Q-0-Z-0.pdb	RB133A	B	A	|Low-Medium|	0
Q13133-Q15788-EXP-5hjs.pdb1-A-0-C-0.pdb	A	A	|Low-Medium|	35.225	2.19442	0.87293	0.0850463	-10.9463	0.188558	-11.1687	0.221023	67	|Low|	42.8802	3.25322	0.891554	0.088636	-10.3836	0.211638	-10.4267	0.315768	329	|High-Medium|	28.6533	0.388973	0.778398	0.0417506	-11.52	0.0447214	-11.82	0.0447214	5	|High|	0	0	0	0	0	0	0	0	0	#mutated->#	Q13133-Q15788-EXP-5hjs.pdb1-A-0-C-0.pdb	EA277A	A	B	|Low-Medium|	76.6124
Q15019-Q8IYM1-MDL-3ftq.pdb5-A-0-B-0.pdb	B	A	|Low-Medium|	0	0	0	0	0	0	0	0	0	|Low|	0	0	0	0	0	0	0	0	0	|High-Medium|	21.7796	0.89318	0.92381	0.0532456	-12.3197	0.122825	-12.4731	0.090955	401	|High|	0	0	0	0	0	0	0	0	0	#mutated->#	Q15019-Q8IYM1-MDL-3ftq.pdb5-A-0-B-0.pdb	DB423N	B	A	|Low-Medium|	0
Q16181-Q8IYM1-MDL-3t5d.pdb1-A-0-C-0.pdb	B	A	|Low-Medium|	0	0	0	0	0	0	0	0	0	|Low|	0	0	0	0	0	0	0	0	0	|High-Medium|	19.8945	0.673769	0.762614	0.0713305	-12.5778	0.0973713	-12.6471	0.0699857	401	|High|	0	0	0	0	0	0	0	0	0	#mutated->#	Q16181-Q8IYM1-MDL-3t5d.pdb1-A-0-C-0.pdb	DB418N	B	A	|Low-Medium|	0
Q16665-Q9GZT9-EXP-5l9v.pdb2-D-0-B-0.pdb	A	A	|Low-Medium|	35.4323	1.55719	0.901689	0.0788272	-10.9309	0.129088	-11.1463	0.162366	337	|Low|	38.3835	0.43616	0.717959	0.024983	-10.6766	0.0426956	-10.875	0.0471405	64	|High-Medium|	0	0	0	0	0	0	0	0	0	|High|	0	0	0	0	0	0	0	0	0	#mutated->#	Q16665-Q9GZT9-EXP-5l9v.pdb2-D-0-B-0.pdb	PA402A	A	B	|Low-Medium|	35.5448
Q92900-Q9HAU5-EXP-2wjv.pdb2-B-0-E-0.pdb	A	A	|Low-Medium|	0	0	0	0	0	0	0	0	0	|Low|	0	0	0	0	0	0	0	0	0	|High-Medium|	18.4266	0.484328	0.576208	0.0686639	-12.8024	0.0854382	-12.794	0.0497928	168	|High|	16.4968	0.847429	0.690329	0.146763	-13.1185	0.153278	-12.9824	0.0865491	233	#mutated->#	Q92900-Q9HAU5-EXP-2wjv.pdb2-B-0-E-0.pdb	VA204D	A	B	|Low-Medium|	0
Q93034-Q96Q27-MDD-Cullin-SOCS_box-4jgh-D-19-384-A-161-194.pdb	B	A	|Low-Medium|	86.6667	0	0.0014	0	-8.4	0	-6.2	0	2	|Low|	73.0852	5.22067	0.0554996	0.0624552	-8.84286	0.199394	-7.50084	0.51626	119	|High-Medium|	0	0	0	0	0	0	0	0	0	|High|	0	0	0	0	0	0	0	0	0	#mutated->#	Q93034-Q96Q27-MDD-Cullin-SOCS_box-4jgh-D-19-384-A-161-194.pdb	LB390A	B	A	|Low-Medium|	88.75
Q96CW9-Q9HBW1-EXP-3zyi.pdb1-B-0-A-0.pdb	A	A	|Low-Medium|	32.0102	2.74507	0.817658	0.0911763	-11.2259	0.234673	-11.4741	0.261052	27	|Low|	40.9091	0	0.853845	0	-10.5	0	-10.6	0	1	|High-Medium|	23.6901	2.37059	0.940017	0.0771179	-12.0912	0.2795	-12.278	0.236232	373	|High|	0	0	0	0	0	0	0	0	0	#mutated->#	Q96CW9-Q9HBW1-EXP-3zyi.pdb1-B-0-A-0.pdb	PA74A	A	B	|Low-Medium|	0
Q96CW9-Q9HCJ2-MDL-3zyi.pdb1-B-0-A-0.pdb	B	A	|Low-Medium|	0	0	0	0	0	0	0	0	0	|Low|	0	0	0	0	0	0	0	0	0	|High-Medium|	18.2945	0.439846	0.557155	0.063652	-12.82	0.0717137	-12.8042	0.0491881	120	|High|	16.7861	0.491569	0.644094	0.0956892	-13.0644	0.0968085	-12.9559	0.0518518	281	#mutated->#	Q96CW9-Q9HCJ2-MDL-3zyi.pdb1-B-0-A-0.pdb	AB489T	B	A	|Low-Medium|	0
Q96EP0-Q9BYM8-EXP-4dbg.pdb1-B-0-A-0.pdb	A	A	|Low-Medium|	35.7287	2.79219	0.805293	0.0890686	-10.9091	0.234327	-11.1364	0.27303	11	|Low|	51.6114	4.71813	0.81127	0.170397	-9.86513	0.264749	-9.57769	0.459786	390	|High-Medium|	0	0	0	0	0	0	0	0	0	|High|	0	0	0	0	0	0	0	0	0	#mutated->#	Q96EP0-Q9BYM8-EXP-4dbg.pdb1-B-0-A-0.pdb	FA620A	A	B	|Low-Medium|	35.3791
Q9NQS7-Q9UQB9-MDL-4c2w.pdb1-D-0-A-0.pdb	B	A	|Low-Medium|	0	0	0	0	0	0	0	0	0	|Low|	0	0	0	0	0	0	0	0	0	|High-Medium|	19.4188	0.79019	0.704999	0.0945672	-12.6509	0.120565	-12.6977	0.0835134	395	|High|	17.2833	0.400703	0.546453	0.0793102	-12.9833	0.0752773	-12.9167	0.0408248	6	#mutated->#	Q9NQS7-Q9UQB9-MDL-4c2w.pdb1-D-0-A-0.pdb	KB89R	B	A	|Low-Medium|	0
[truncated: 38 more columns]

## Sheet: 2226
x	x	x	x	x	x	x	x	x	x	x	x	x	x	x	x	x	x	x	x	x	x	x	x	x	x	x	x	x	x	x	x	x	x	x	x	x	x	x	x	x	x	x	x	x	x	x	x	x	x
O00757-P09467-MDL-5q0c.pdb2-E-0-F-0.pdb	B	A	|Low-Medium|	0	0	0	0	0	0	0	0	0	|Low|	0	0	0	0	0	0	0	0	0	|High-Medium|	18.2901	0.941771	0.549361	0.12528	-12.8222	0.139443	-12.8333	0.111803	9	|High|	15.4804	0.986355	0.843763	0.132544	-13.3031	0.188657	-13.0788	0.100818	392	#mutated->#	O00757-P09467-MDL-5q0c.pdb2-E-0-F-0.pdb	RB538K	B	A	|Low-Medium|	0
O14745-P15311-MDL-2d10.pdb3-G-0-C-0.pdb	A	A	|Low-Medium|	35.6945	1.87821	0.869014	0.0985293	-10.913	0.161395	-11.1304	0.191914	46	|Low|	43.5719	2.32486	0.933825	0.0696005	-10.3318	0.15883	-10.3625	0.226941	355	|High-Medium|	0	0	0	0	0	0	0	0	0	|High|	0	0	0	0	0	0	0	0	0	#mutated->#	O14745-P15311-MDL-2d10.pdb3-G-0-C-0.pdb	FA17A	A	B	|Low-Medium|	35.472
O14931-P46379-MDD-V-set-ubiquitin-3dvg-A-6-109-X-3-73.pdb	A	A	|Low-Medium|	88.4694	2.94785	0.0014	0	-8.34286	0.0920087	-6.03571	0.266964	28	|Low|	70.9891	8.0143	0.119822	0.145384	-8.94756	0.318358	-7.71576	0.782905	349	|High-Medium|	0	0	0	0	0	0	0	0	0	|High|	0	0	0	0	0	0	0	0	0	#mutated->#	O14931-P46379-MDD-V-set-ubiquitin-3dvg-A-6-109-X-3-73.pdb	NA46Q	A	B	|Low-Medium|	86.9504
O15217-P09210-MDL-3ik7.pdb1-A-0-B-0.pdb	B	A	|Low-Medium|	30	0	0.754305	0	-11.4	0	-11.7	0	1	|Low|	0	0	0	0	0	0	0	0	0	|High-Medium|	22.4329	2.41182	0.897716	0.142928	-12.2507	0.312484	-12.4089	0.234291	359	|High|	16.5254	0.79311	0.687007	0.138715	-13.1146	0.149266	-12.9902	0.0860374	41	#mutated->#	O15217-P09210-MDL-3ik7.pdb1-A-0-B-0.pdb	PB328S	B	A	|Low-Medium|	0
O15553-Q9ULZ3-MDL-2n1f.pdb1-L-0-K-0.pdb	B	A	|Low-Medium|	33.3333	0	0.994026	0	-11.1	0	-11.4	0	1	|Low|	64.4621	7.72095	0.284545	0.275053	-9.22652	0.360912	-8.34268	0.747161	396	|High-Medium|	0	0	0	0	0	0	0	0	0	|High|	0	0	0	0	0	0	0	0	0	#mutated->#	O15553-Q9ULZ3-MDL-2n1f.pdb1-L-0-K-0.pdb	RB83A	B	A	|Low-Medium|	0
O43157-P61587-MDL-3su8.pdb1-X-0-A-0.pdb	B	A	|Low-Medium|	36.6697	1.40756	0.817122	0.101426	-10.8364	0.112006	-11.0182	0.166242	11	|Low|	44.6152	3.72245	0.920676	0.0901129	-10.2726	0.223184	-10.2487	0.362774	390	|High-Medium|	0	0	0	0	0	0	0	0	0	|High|	0	0	0	0	0	0	0	0	0	#mutated->#	O43157-P61587-MDL-3su8.pdb1-X-0-A-0.pdb	NB637R	B	A	|Low-Medium|	36.3845
O76015-P02538-MDL-4zry.pdb1-A-0-B-0.pdb	B	A	|Low-Medium|	0	0	0	0	0	0	0	0	0	|Low|	0	0	0	0	0	0	0	0	0	|High-Medium|	0	0	0	0	0	0	0	0	0	|High|	12.3218	0.73679	0.82872	0.109458	-13.9576	0.174781	-13.385	0.0785847	401	#mutated->#	O76015-P02538-MDL-4zry.pdb1-A-0-B-0.pdb	IB195S	B	A	|Low-Medium|	0
O76015-P35908-MDL-4zry.pdb1-A-0-B-0.pdb	B	A	|Low-Medium|	0	0	0	0	0	0	0	0	0	|Low|	0	0	0	0	0	0	0	0	0	|High-Medium|	19.0769	0	0.669191	0	-12.7	0	-12.7	0	1	|High|	13.3508	1.22585	0.895403	0.0941341	-13.7317	0.257259	-13.2843	0.121093	400	#mutated->#	O76015-P35908-MDL-4zry.pdb1-A-0-B-0.pdb	LB202P	B	A	|Low-Medium|	0
P01834-P18465-EXP-3vh8.pdb2-F-0-D-0.pdb	A	A	|Low-Medium|	0	0	0	0	0	0	0	0	0	|Low|	59.3724	2.08969	0.441808	0.117045	-9.48454	0.101293	-8.87082	0.205235	401	|High-Medium|	0	0	0	0	0	0	0	0	0	|High|	0	0	0	0	0	0	0	0	0	#mutated->#	P01834-P18465-EXP-3vh8.pdb2-F-0-D-0.pdb	SA8F	A	B	|Low-Medium|	0
P01892-P61769-EXP-3mrg.pdb1-A-0-B-0.pdb	A	A	|Low-Medium|	0	0	0	0	0	0	0	0	0	|Low|	0	0	0	0	0	0	0	0	0	|High-Medium|	19.0226	0.881942	0.652692	0.108002	-12.7095	0.134559	-12.7354	0.0900179	328	|High|	17.158	0.46549	0.570896	0.0910022	-12.9973	0.0865586	-12.9205	0.0406848	73	#mutated->#	P01892-P61769-EXP-3mrg.pdb1-A-0-B-0.pdb	EA229K	A	B	|Low-Medium|	0
P01892-Q9BX59-MDL-5opi.pdb1-A-0-C-0.pdb	A	A	|Low-Medium|	30.4278	0.571963	0.797946	0.0573041	-11.3605	0.0540347	-11.6346	0.061564	81	|Low|	0	0	0	0	0	0	0	0	0	|High-Medium|	26.984	1.3602	0.903485	0.0783736	-11.7109	0.150357	-11.9663	0.136865	320	|High|	0	0	0	0	0	0	0	0	0	#mutated->#	P01892-Q9BX59-MDL-5opi.pdb1-A-0-C-0.pdb	DA122R	A	B	|Low-Medium|	30.2844
P02489-P02511-MDL-3l1e.pdb1-A-0-A-1.pdb	A	A	|Low-Medium|	0	0	0	0	0	0	0	0	0	|Low|	0	0	0	0	0	0	0	0	0	|High-Medium|	21.959	1.16431	0.928073	0.0929018	-12.3007	0.15724	-12.4546	0.113732	401	|High|	0	0	0	0	0	0	0	0	0	#mutated->#	P02489-P02511-MDL-3l1e.pdb1-A-0-A-1.pdb	DA78N	A	B	|Low-Medium|	0
P02538-P13646-MDL-4zry.pdb1-B-0-A-0.pdb	A	A	|Low-Medium|	0	0	0	0	0	0	0	0	0	|Low|	0	0	0	0	0	0	0	0	0	|High-Medium|	0	0	0	0	0	0	0	0	0	|High|	12.7899	0.539619	0.900204	0.0665587	-13.8454	0.125239	-13.3374	0.0632239	401	#mutated->#	P02538-P13646-MDL-4zry.pdb1-B-0-A-0.pdb	AA95P	A	B	|Low-Medium|	0
P02538-P19012-MDL-3tnu.pdb1-B-1-A-1.pdb	A	A	|Low-Medium|	0	0	0	0	0	0	0	0	0	|Low|	0	0	0	0	0	0	0	0	0	|High-Medium|	0	0	0	0	0	0	0	0	0	|High|	13.8134	0.782481	0.957343	0.0561187	-13.6257	0.168118	-13.2374	0.0862975	401	#mutated->#	P02538-P19012-MDL-3tnu.pdb1-B-1-A-1.pdb	IA86S	A	B	|Low-Medium|	0
P02538-Q15323-MDL-4zry.pdb1-B-0-A-0.pdb	A	A	|Low-Medium|	0	0	0	0	0	0	0	0	0	|Low|	0	0	0	0	0	0	0	0	0	|High-Medium|	0	0	0	0	0	0	0	0	0	|High|	12.5628	0.688324	0.864893	0.0954907	-13.896	0.162432	-13.3626	0.0744799	401	#mutated->#	P02538-Q15323-MDL-4zry.pdb1-B-0-A-0.pdb	AA95P	A	B	|Low-Medium|	0
P02538-Q6A162-MDL-4zry.pdb1-B-0-A-0.pdb	A	A	|Low-Medium|	0	0	0	0	0	0	0	0	0	|Low|	0	0	0	0	0	0	0	0	0	|High-Medium|	0	0	0	0	0	0	0	0	0	|High|	12.0082	0.890715	0.771891	0.132337	-14.0342	0.211672	-13.4167	0.0908027	401	#mutated->#	P02538-Q6A162-MDL-4zry.pdb1-B-0-A-0.pdb	IA94S	A	B	|Low-Medium|	0
P03372-P06401-MDL-5w9d.pdb1-A-0-B-0.pdb	A	A	|Low-Medium|	31.3651	0.797759	0.884359	0.0653103	-11.3	0.0816497	-11.525	0.0957427	4	|Low|	0	0	0	0	0	0	0	0	0	|High-Medium|	24.9755	1.6714	0.97543	0.0556865	-11.9305	0.197466	-12.1617	0.160633	397	|High|	0	0	0	0	0	0	0	0	0	#mutated->#	P03372-P06401-MDL-5w9d.pdb1-A-0-B-0.pdb	YA231F	A	B	|Low-Medium|	0
P11474-Q9UBK2-EXP-3d24.pdb3-C-0-D-0.pdb	A	A	|Low-Medium|	35.1866	1.79924	0.90197	0.0872572	-10.9511	0.145654	-11.1763	0.179126	186	|Low|	41.6447	2.99439	0.854261	0.0979174	-10.4651	0.204008	-10.5448	0.299164	212	|High-Medium|	28.153	1.28564	0.817503	0.122886	-11.6	0.1	-11.8333	0.152753	3	|High|	0	0	0	0	0	0	0	0	0	#mutated->#	P11474-Q9UBK2-EXP-3d24.pdb3-C-0-D-0.pdb	DA423A	A	B	|Low-Medium|	34.7527
P11802-P24385-EXP-2w96.pdb1-B-0-A-0.pdb	A	A	|Low-Medium|	0	0	0	0	0	0	0	0	0	|Low|	0	0	0	0	0	0	0	0	0	|High-Medium|	20.5747	1.07748	0.823743	0.09591	-12.4873	0.151205	-12.5875	0.106038	401	|High|	0	0	0	0	0	0	0	0	0	#mutated->#	P11802-P24385-EXP-2w96.pdb1-B-0-A-0.pdb	NA41S	A	B	|Low-Medium|	0
P11802-P30281-EXP-3g33.pdb1-C-0-B-0.pdb	A	A	|Low-Medium|	30.8901	1.12262	0.831309	0.0847073	-11.3309	0.106352	-11.5843	0.109855	217	|Low|	0	0	0	0	0	0	0	0	0	|High-Medium|	26.7463	1.98039	0.892914	0.110011	-11.737	0.217395	-11.9962	0.19873	184	|High|	0	0	0	0	0	0	0	0	0	#mutated->#	P11802-P30281-EXP-3g33.pdb1-C-0-B-0.pdb	NA46S	A	B	|Low-Medium|	30.8597
P11802-P42772-MDL-1bi7.pdb1-A-1-B-1.pdb	A	A	|Low-Medium|	30.3742	0.842537	0.787784	0.0766406	-11.3669	0.081457	-11.6382	0.0850465	178	|Low|	0	0	0	0	0	0	0	0	0	|High-Medium|	28.552	0.67576	0.785146	0.0655057	-11.5498	0.0696674	-11.8045	0.0739952	223	|High|	0	0	0	0	0	0	0	0	0	#mutated->#	P11802-P42772-MDL-1bi7.pdb1-A-1-B-1.pdb	RA20C	A	B	|Low-Medium|	30.0527
P11802-P55273-MDL-1blx.pdb1-A-0-B-0.pdb	A	A	|Low-Medium|	34.6699	1.71941	0.927783	0.0738113	-10.9945	0.145614	-11.2283	0.172937	382	|Low|	38.8237	0.799312	0.742518	0.0435446	-10.6687	0.060208	-10.825	0.0856349	16	|High-Medium|	25.1427	2.27309	0.963995	0.0677403	-11.9	0.3	-12.1667	0.251661	3	|High|	0	0	0	0	0	0	0	0	0	#mutated->#	P11802-P55273-MDL-1blx.pdb1-A-0-B-0.pdb	RA23H	A	B	|Low-Medium|	34.2878
P13646-P35908-MDL-4zry.pdb1-A-1-B-1.pdb	B	A	|Low-Medium|	0	0	0	0	0	0	0	0	0	|Low|	0	0	0	0	0	0	0	0	0	|High-Medium|	0	0	0	0	0	0	0	0	0	|High|	13.9733	0.77459	0.959857	0.0548494	-13.5958	0.161731	-13.2249	0.0801658	401	#mutated->#	P13646-P35908-MDL-4zry.pdb1-A-1-B-1.pdb	LB211P	B	A	|Low-Medium|	0
P13747-P17693-EXP-3bze.pdb1-A-0-P-0.pdb	A	A	|Low-Medium|	0	0	0	0	0	0	0	0	0	|Low|	0	0	0	0	0	0	0	0	0	|High-Medium|	22.7205	1.08406	0.968483	0.0494977	-12.2005	0.137101	-12.3825	0.110564	400	|High|	17.6136	0	0.48148	0	-12.9	0	-12.9	0	1	#mutated->#	P13747-P17693-EXP-3bze.pdb1-A-0-P-0.pdb	RA62A	A	B	|Low-Medium|	0
P17693-Q13241-EXP-3cdg.pdb2-Q-0-E-0.pdb	B	A	|Low-Medium|	86.7631	9.5904	0.0276413	0.143729	-8.39333	0.465302	-6.18	0.934179	30	|Low|	75.0225	8.98593	0.0825847	0.207471	-8.7967	0.382482	-7.32075	0.87289	212	|High-Medium|	0	0	0	0	0	0	0	0	0	|High|	0	0	0	0	0	0	0	0	0	#mutated->#	P17693-Q13241-EXP-3cdg.pdb2-Q-0-E-0.pdb	QB79A	B	A	|Low-Medium|	85.8135
P18465-P43629-EXP-3vh8.pdb1-A-0-G-0.pdb	B	A	|Low-Medium|	0	0	0	0	0	0	0	0	0	|Low|	0	0	0	0	0	0	0	0	0	|High-Medium|	22.5234	1.24231	0.955334	0.0529225	-12.2249	0.158356	-12.4025	0.124072	401	|High|	0	0	0	0	0	0	0	0	0	#mutated->#	P18465-P43629-EXP-3vh8.pdb1-A-0-G-0.pdb	GB138W	B	A	|Low-Medium|	0
P19012-P35908-MDL-4zry.pdb2-A-0-B-0.pdb	B	A	|Low-Medium|	0	0	0	0	0	0	0	0	0	|Low|	0	0	0	0	0	0	0	0	0	|High-Medium|	0	0	0	0	0	0	0	0	0	|High|	12.508	0.650741	0.857873	0.0808459	-13.9122	0.148409	-13.3651	0.0680298	401	#mutated->#	P19012-P35908-MDL-4zry.pdb2-A-0-B-0.pdb	IB204N	B	A	|Low-Medium|	0
P30499-P43632-MDL-4n8v.pdb2-D-0-I-0.pdb	B	A	|Low-Medium|	34.6017	2.29632	0.890364	0.0909857	-10.9862	0.185233	-11.2421	0.221233	152	|Low|	39.8938	1.15506	0.799392	0.0577478	-10.5843	0.0790293	-10.704	0.120416	249	|High-Medium|	0	0	0	0	0	0	0	0	0	|High|	0	0	0	0	0	0	0	0	0	#mutated->#	P30499-P43632-MDL-4n8v.pdb2-D-0-I-0.pdb	AB451S	B	A	|Low-Medium|	34.988
P30504-P43632-MDL-4n8v.pdb1-A-0-G-0.pdb	B	A	|Low-Medium|	35.9065	1.31412	0.88406	0.0988045	-10.8991	0.105454	-11.1074	0.142543	108	|Low|	40.8481	1.6409	0.843032	0.0751867	-10.5273	0.115888	-10.628	0.16563	293	|High-Medium|	0	0	0	0	0	0	0	0	0	|High|	0	0	0	0	0	0	0	0	0	#mutated->#	P30504-P43632-MDL-4n8v.pdb1-A-0-G-0.pdb	KB312M	B	A	|Low-Medium|	35.9314
P35908-Q15323-MDL-4zry.pdb1-B-0-A-0.pdb	A	A	|Low-Medium|	0	0	0	0	0	0	0	0	0	|Low|	0	0	0	0	0	0	0	0	0	|High-Medium|	0	0	0	0	0	0	0	0	0	|High|	12.3722	0.865776	0.829355	0.120489	-13.9479	0.205065	-13.3786	0.0888195	401	#mutated->#	P35908-Q15323-MDL-4zry.pdb1-B-0-A-0.pdb	IA94N	A	B	|Low-Medium|	0
P40692-P54278-MDL-3h4l.pdb1-A-0-B-0.pdb	A	A	|Low-Medium|	29.6774	0	0.717389	0	-11.4	0	-11.7	0	1	|Low|	0	0	0	0	0	0	0	0	0	|High-Medium|	26.182	1.37962	0.948493	0.0717728	-11.7937	0.155874	-12.047	0.135783	400	|High|	0	0	0	0	0	0	0	0	0	#mutated->#	P40692-P54278-MDL-3h4l.pdb1-A-0-B-0.pdb	EA56.	A	B	|Low-Medium|	29.8851
P43632-Q29960-MDL-4n8v.pdb2-I-0-D-0.pdb	A	A	|Low-Medium|	34.1908	2.60763	0.873028	0.0926168	-11.037	0.217202	-11.2627	0.259574	311	|Low|	40.0397	1.14595	0.806905	0.0553546	-10.5766	0.080942	-10.7052	0.115731	77	|High-Medium|	28.0452	1.0295	0.829133	0.0699368	-11.5769	0.130089	-11.8538	0.11266	13	|High|	0	0	0	0	0	0	0	0	0	#mutated->#	P43632-Q29960-MDL-4n8v.pdb2-I-0-D-0.pdb	AA178S	A	B	|Low-Medium|	36.5073
P43632-Q9TNN7-MDL-4n8v.pdb1-G-0-A-0.pdb	A	A	|Low-Medium|	36.3033	1.82992	0.824568	0.0944341	-10.8592	0.153297	-11.0757	0.179412	206	|Low|	39.6132	0.838728	0.786129	0.0453179	-10.6128	0.0608339	-10.7467	0.0845038	195	|High-Medium|	0	0	0	0	0	0	0	0	0	|High|	0	0	0	0	0	0	0	0	0	#mutated->#	P43632-Q9TNN7-MDL-4n8v.pdb1-G-0-A-0.pdb	KA38M	A	B	|Low-Medium|	35.7178
P51587-Q86YC2-EXP-3eu7.pdb3-X-0-A-0.pdb	A	A	|Low-Medium|	0	0	0	0	0	0	0	0	0	|Low|	66.6667	0	0.131646	0	-9.1	0	-8.1	0	401	|High-Medium|	0	0	0	0	0	0	0	0	0	|High|	0	0	0	0	0	0	0	0	0	#mutated->#	P51587-Q86YC2-EXP-3eu7.pdb3-X-0-A-0.pdb	IA27V	A	B	|Low-Medium|	0
P54725-Q05086-MDD-ubiquitin-HECT-5c7m-C-3-72-A-598-899.pdb	B	A	|Low-Medium|	32.9744	2.07634	0.909099	0.0851867	-11.1344	0.183819	-11.3959	0.191978	244	|Low|	41.0461	3.18749	0.824095	0.0908971	-10.5154	0.207253	-10.6077	0.317393	26	|High-Medium|	26.28	2.2103	0.906672	0.107893	-11.7969	0.242721	-12.0305	0.220452	131	|High|	0	0	0	0	0	0	0	0	0	#mutated->#	P54725-Q05086-MDD-ubiquitin-HECT-5c7m-C-3-72-A-598-899.pdb	CB335A	B	A	|Low-Medium|	30.4555
P60891-Q14558-MDL-4lyg.pdb1-B-1-A-1.pdb	A	A	|Low-Medium|	0	0	0	0	0	0	0	0	0	|Low|	0	0	0	0	0	0	0	0	0	|High-Medium|	18.4919	0.37075	0.58688	0.0538439	-12.7891	0.0648942	-12.7889	0.0421301	359	|High|	17.1662	0.45492	0.56964	0.0897427	-12.9929	0.0866528	-12.9238	0.0431081	42	#mutated->#	P60891-Q14558-MDL-4lyg.pdb1-B-1-A-1.pdb	NA112S	A	B	|Low-Medium|	0
Q92542-Q9NZ42-EXP-6iyc.pdb1-A-0-D-0.pdb	B	A	|Low-Medium|	31.7308	1.9231	0.872688	0.0731902	-11.225	0.15	-11.5	0.2	4	|Low|	57.2135	2.55094	0.558099	0.113866	-9.54351	0.126833	-9.02748	0.251238	393	|High-Medium|	25.3928	2.8202	0.926458	0.138566	-11.875	0.287228	-12.15	0.251661	4	|High|	0	0	0	0	0	0	0	0	0	#mutated->#	Q92542-Q9NZ42-EXP-6iyc.pdb1-A-0-D-0.pdb	DB90E	B	A	|Low-Medium|	33.0279
[truncated: 38 more columns]

[truncated: 11 more sheets: 0382_notinPBP, 0573_notinPBP, 1131_notinPBP, 1129_notinPBP, 1130_notinPBP, 1132_notinPBP, 1128_notinPBP, 1133_notinPBP, 2226_notinPBP, 2227_notinPBP, 0119_notinPBP]
